# Supplementary material for: Cobalt-catalyzed ammonia borane dehydrocoupling and transfer hydrogenation under aerobic conditions
Source: Royal Society of Chemistry journal article supplement (doi:10.1039/c5dt00108k), 2015-01-01
Supplement: c5dt00108k1.pdf [file c5dt00108k1.pdf]

**Supporting Information for:**

**Cobalt-catalyzed ammonia borane dehydrocoupling and transfer hydrogenation under aerobic conditions**

Justin K. Pagano, John P. W. Stelmach, and Rory Waterman\*

*Department of Chemistry, University of Vermont, Burlington, VT 05405-0125*

rory.waterman@uvm.edu

---

|                                                                             |       |
|-----------------------------------------------------------------------------|-------|
| Experimental considerations                                                 | 2–3   |
| Determination of H <sub>2</sub> volume produced                             | 4–5   |
| Table S1: Concentration controlled amine borane dehydrocoupling by <b>1</b> | 6     |
| Table S2: Concentration controlled amine borane dehydrocoupling by <b>2</b> | 7     |
| CpCo(CO)I <sub>2</sub> + AB                                                 | 8     |
| Cp*Co(CO)I <sub>2</sub> + AB                                                | 9–10  |
| H <sub>2</sub> collection reaction                                          | 11–12 |
| IR spectrum for H <sub>2</sub> collection reaction                          | 13    |
| Control reaction                                                            | 14    |
| Transfer hydrogenation reactions                                            | 15–38 |
| References                                                                  | 39    |

## Experimental Considerations

### *General Considerations*

All manipulations were performed under an inert atmosphere of N<sub>2</sub> using Schlenk line or glovebox techniques using oxygen-free, anhydrous solvents unless otherwise specified. NMR spectra were recorded using a Bruker AXR 500 MHz spectrometer, using an external reference of 10 % BF<sub>3</sub>•Et<sub>2</sub>O in CDCl<sub>3</sub> for <sup>11</sup>B NMR experiments and residual solvent resonances for <sup>1</sup>H and <sup>13</sup>C{<sup>1</sup>H} experiments (δ 3.58 and δ 67.31, respectively). GC spectra were collected using a Varian Saturn 2100T gas chromatograph. Ammonia borane was purchased from Sigma Aldrich and opened August 2014, after which it was stored at –35 °C under an inert atmosphere of N<sub>2</sub>. THF-*d*<sub>8</sub> was purchased from Cambridge Isotopes and was stored over Na at –35 °C in the dark under an inert atmosphere of N<sub>2</sub>. All other reagents were obtained from commercial suppliers and dried by conventional means as necessary. Stock solutions of CpCo(CO)I<sub>2</sub> (1.0 mM, 2.0 mM, 4.0 mM), Cp\*Co(CO)I<sub>2</sub> (1.0 mM, 2.0 mM, 4.0 mM), and NH<sub>3</sub>BH<sub>3</sub> (1.0 M, 2.0 M, 4.0 M) were prepared in a glovebox using anhydrous THF, volumetric glassware, and were stored at –30 °C in the dark prior to use. CpCo(CO)I<sub>2</sub>,<sup>1</sup> Cp\*Co(CO)I<sub>2</sub>,<sup>1</sup> and [Cp\*Co(CO)I][PF<sub>6</sub>]<sup>2</sup> were prepared according to literature procedures. Borazine,<sup>3</sup> borazane,<sup>3</sup> cyclodiborazane,<sup>3</sup> *B*-(cyclodiborazanyl)aminoborohydride,<sup>4</sup> polyborazylene,<sup>3</sup> and polyaminoborane<sup>5</sup> were identified by their reported <sup>11</sup>B NMR chemical shifts as compared to the unreacted ammonia borane as an internal reference.

**Safety note:** Handling amine boranes represents a series of potential hazards. A resource to help identify potential safety issues is [http://h2bestpractices.org/docs/nbh\\_h2\\_storage\\_survey.pdf](http://h2bestpractices.org/docs/nbh_h2_storage_survey.pdf)

#### (1) Typical procedure for dehydrocoupling reactions

Stock solutions of Cp\*Co(CO)I<sub>2</sub> (0.20 mL, 2.0 mM) in THF and NH<sub>3</sub>BH<sub>3</sub> (0.20 mL, 2.0 M) in THF were added to a PTFE-sealed NMR tube (quartz or borosilicate) in an N<sub>2</sub>-filled glovebox, whereupon immediate gas evolution and a color change from dark red to light green occurred. After two freeze-pump-thaw cycles, an initial <sup>11</sup>B{<sup>1</sup>H} NMR spectrum was collected. The solution was then heated to 65 °C, and <sup>11</sup>B{<sup>1</sup>H} NMR spectra were collected at 2 h, 4 h, 6 h, 8 h, and 24 h intervals. After each NMR experiment, an additional freeze-pump-thaw cycle was performed to remove H<sub>2</sub>.

#### (2) Typical procedure for aerobic dehydrocoupling reactions

A mixture of solutions of Cp\*Co(CO)I<sub>2</sub> (0.40 mL, 2.0 mM) in THF and NH<sub>3</sub>BH<sub>3</sub> (0.40 mL, 2.0 M) in THF were measured in an N<sub>2</sub> filled glovebox, then transferred in air and thoroughly mixed before being added to a Schlenk flask fitted with a condenser, septum, and venting needle. An initial aliquot of the reaction mixture was analyzed by <sup>11</sup>B{<sup>1</sup>H} NMR, and the reaction mixture was heated to 65 °C. Additional <sup>11</sup>B{<sup>1</sup>H} NMR spectra were collected using a quartz NMR tube at 1 h, 1.5 h, 2 h, and 3 h intervals.

### (3) Typical procedure for transfer hydrogenation reactions

A stock solution of  $\text{Cp}^*\text{Co}(\text{CO})\text{I}_2$  (0.20 mL, 2.0 mM) in THF was added to the unsaturated organic (0.0690 mmol) followed by addition of a stock solution of  $\text{NH}_3\text{BH}_3$  (0.20 mL, 2.0 M). This solution was quickly transferred to a PTFE-sealed NMR tube (quartz or borosilicate) in an  $\text{N}_2$ -filled glovebox, whereupon immediate gas evolution and a color change from dark red to light green occurred. Initial  $^{11}\text{B}\{^1\text{H}\}$  and  $^{13}\text{C}\{^1\text{H}\}$  NMR spectra were collected, then the solution was heated to 65 °C. Additional NMR spectra were collected after 3 h, 6 h, and 24 h intervals.

### (4) Typical procedure for aerobic transfer hydrogenation reactions

A stock solution of  $\text{Cp}^*\text{Co}(\text{CO})\text{I}_2$  (0.40 mL, 2.0 mM) in THF was added to the unsaturated organic (0.138 mmol) which was then added to a stock solution of  $\text{NH}_3\text{BH}_3$  (0.40 mL, 2.0 M) in air before being thoroughly mixed and transferred to a Schlenk flask fitted with a condenser, septum, and venting needle. Initial  $^{11}\text{B}\{^1\text{H}\}$  and  $^{13}\text{C}\{^1\text{H}\}$  NMR spectra were collected, then the solution was heated to 65 °C. Additional NMR spectra were collected using a quartz NMR tube after 3 h, 6 h, and 24 h intervals.

### Determination of H<sub>2</sub> volume produced

A mixture of solutions of Cp\*Co(CO)I<sub>2</sub> (0.40 mL, 2.0 mM) in THF and NH<sub>3</sub>BH<sub>3</sub> (0.40 mL, 2.0 M) in THF were measured in an N<sub>2</sub> filled glovebox, then transferred in air and thoroughly mixed before being added to a Schlenk flask fitted with a condenser that was connected to a gas burette (Figure S.1). The reaction was then heated to 65 °C and allowed to run for 4 h, whereupon there was no further visible gas evolution. The actual pressure of H<sub>2</sub> gas evolved was determined as follows:

$$P_{H_2} = P_{atm} - P_{THF} - P_{column} - P_{H_2O}$$

Where  $P_{H_2}$  is the actual pressure of H<sub>2</sub> gas,  $P_{atm}$  is the atmospheric pressure,  $P_{THF}$  is the vapor pressure of THF at the measured ambient temperature (20–22 °C),  $P_{column}$  is the pressure caused by the weight of water in the gas burette, and  $P_{H_2O}$  is the vapor pressure of H<sub>2</sub>O measured at ambient temperature. The moles of H<sub>2</sub> produced were calculated using the ideal gas law. Turnover number (TON) was determined by the following equation.<sup>6</sup>

$$TON = n_{H_2}/n_{cat}$$

Turnover frequency (TOF) is defined as the TON for the first hour of the reaction.

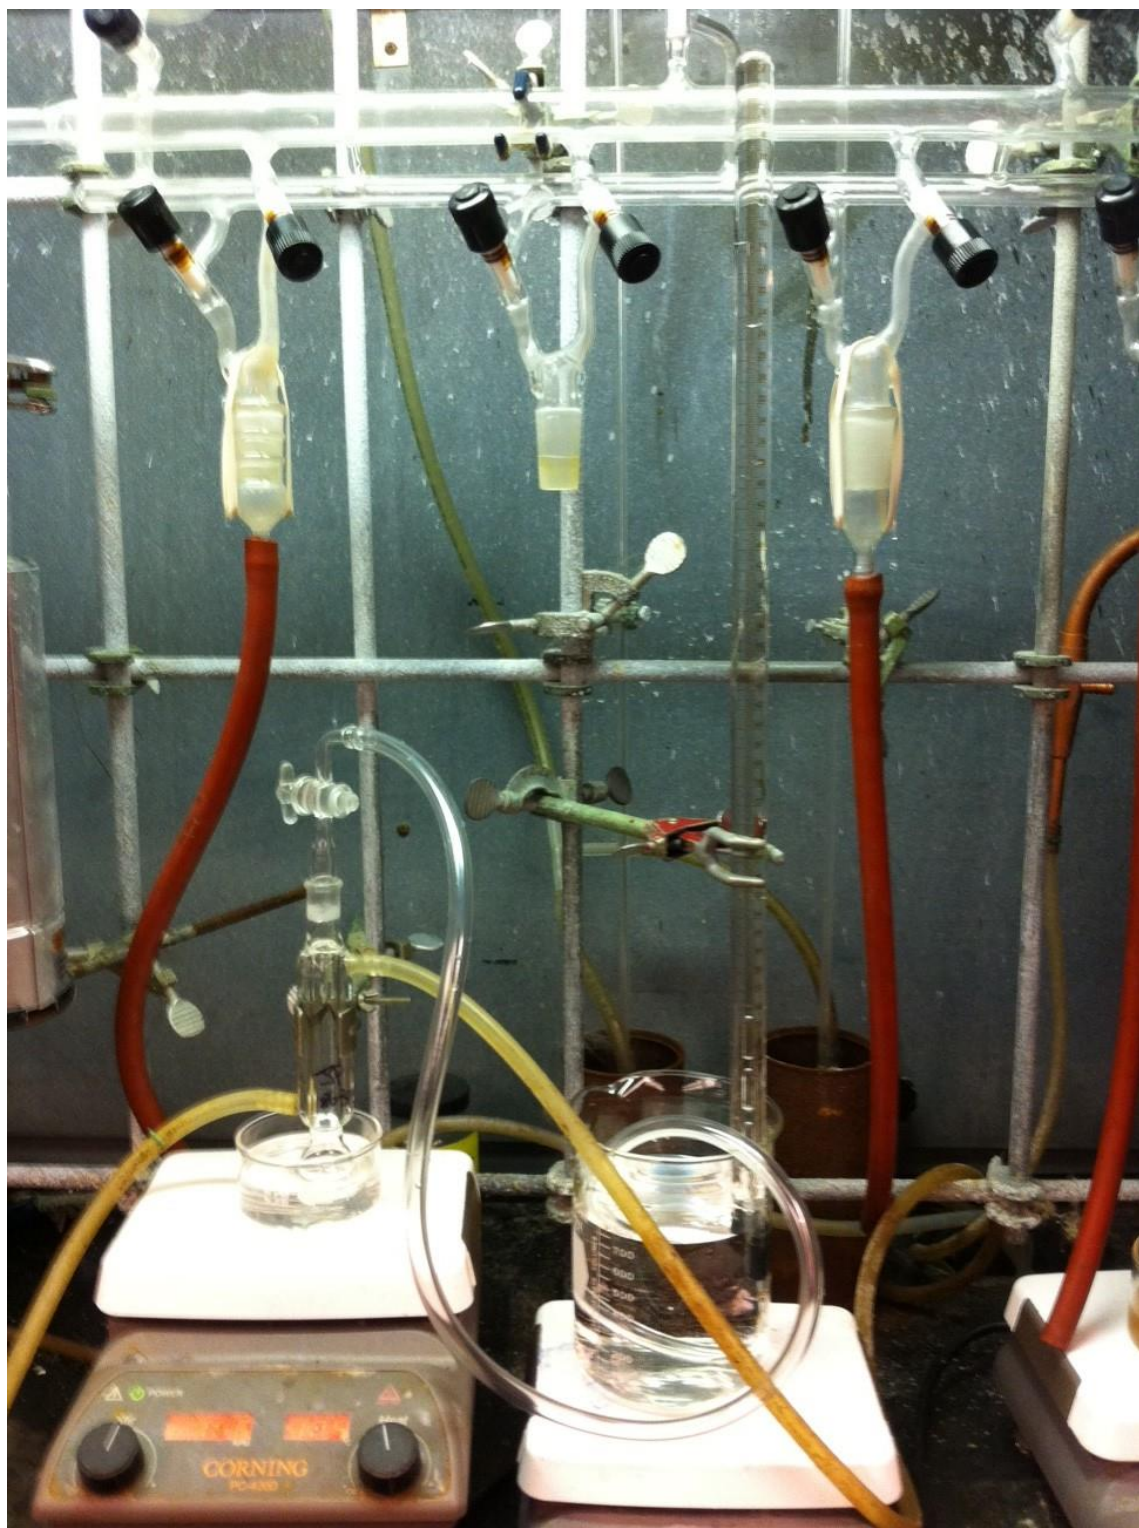

Figure S-1: Experimental setup for determination of moles of  $\text{H}_2$  gas produced

**Table S-1: Concentration controlled amine borane dehydrocoupling by **1****

|                                                   |     |     |     |     |     |     |     |     |     |
|---------------------------------------------------|-----|-----|-----|-----|-----|-----|-----|-----|-----|
| Catalyst Concentration (mM)                       | 1.0 | 1.0 | 1.0 | 2.0 | 2.0 | 2.0 | 4.0 | 4.0 | 4.0 |
| NH <sub>3</sub> BH <sub>3</sub> Concentration (M) | 1.0 | 2.0 | 4.0 | 1.0 | 2.0 | 4.0 | 1.0 | 2.0 | 4.0 |
| Conversion (%)                                    | 98  | 97  | 97  | 99  | 98  | 96  | 99  | 98  | 98  |

Reaction conditions: 0.20 mL **1** in THF, 0.20 mL NH<sub>3</sub>BH<sub>3</sub> in THF, 65 °C, 2 freeze-pump-thaw cycles performed

before heating and every 2 h thereafter, 24 h

Table S-2: Concentration controlled amine borane dehydrocoupling by **2**

|                                                   |     |     |     |     |     |     |     |     |     |
|---------------------------------------------------|-----|-----|-----|-----|-----|-----|-----|-----|-----|
| Catalyst Concentration (mM)                       | 1.0 | 1.0 | 1.0 | 2.0 | 2.0 | 2.0 | 4.0 | 4.0 | 4.0 |
| NH <sub>3</sub> BH <sub>3</sub> Concentration (M) | 1.0 | 2.0 | 4.0 | 1.0 | 2.0 | 4.0 | 1.0 | 2.0 | 4.0 |
| Conversion (%)                                    | 99  | 96  | 98  | 99  | 97  | 97  | 98  | 98  | 98  |

Reaction conditions: 0.20 mL **2** in THF, 0.20 mL NH<sub>3</sub>BH<sub>3</sub> in THF, 65 °C, 2 freeze-pump-thaw cycles performed

before heating and every 2 h thereafter, 24 h

# CpCo(CO)I<sub>2</sub> + AB

Example <sup>11</sup>B{<sup>1</sup>H} NMR spectrum, THF, quartz PTFE-sealed NMR tube

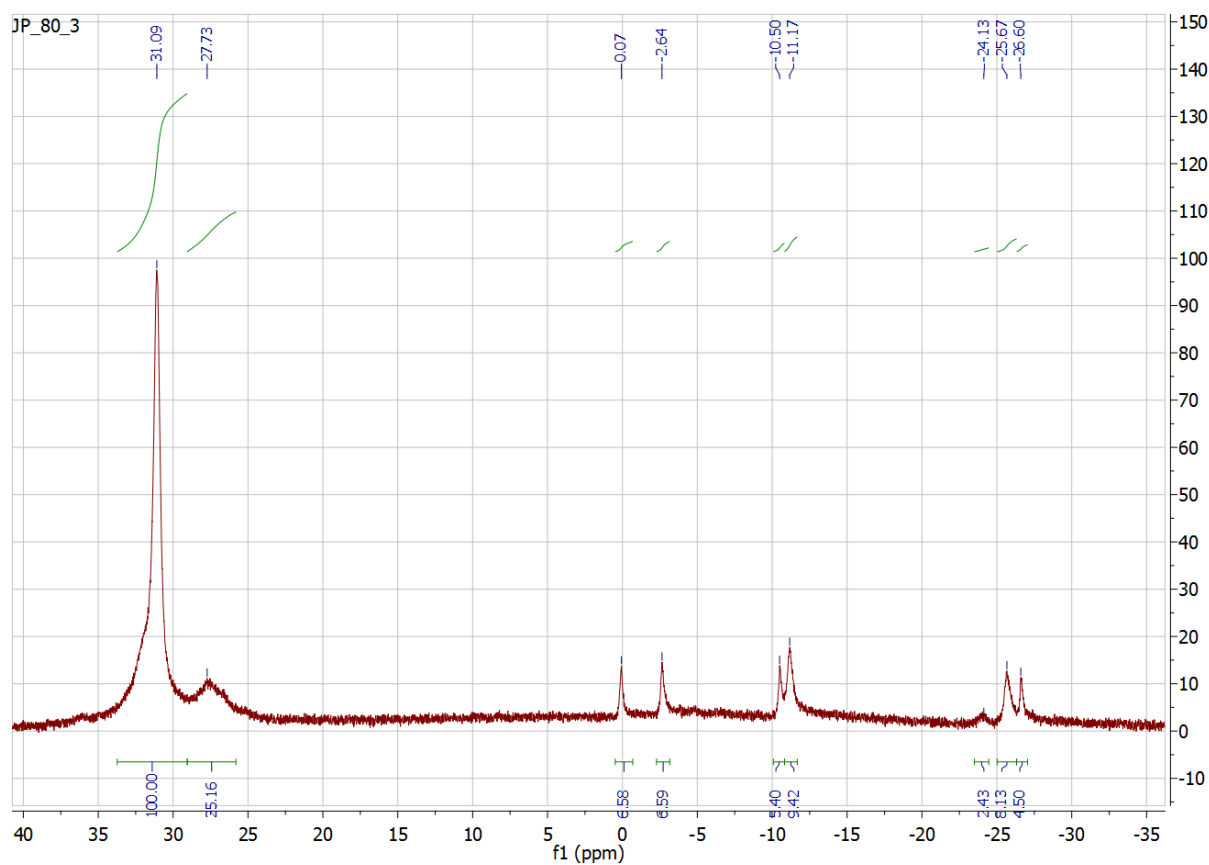

| δ (ppm)      | 31.1     | 27.7           | -10.5    | -11.2           | 0, -2.6, -24.1, -25.7, -26.6 |
|--------------|----------|----------------|----------|-----------------|------------------------------|
| Product      | Borazine | Polyborazylene | Borazane | Cyclodiborazane | Unknown                      |
| % Conversion | 60.0     | 21.5           | 5.1      | 2.2             | 11.2                         |



Cp\*Co(CO)I<sub>2</sub> + AB

Example <sup>11</sup>B{<sup>1</sup>H} NMR spectrum, THF, quartz PTFE-sealed NMR tube

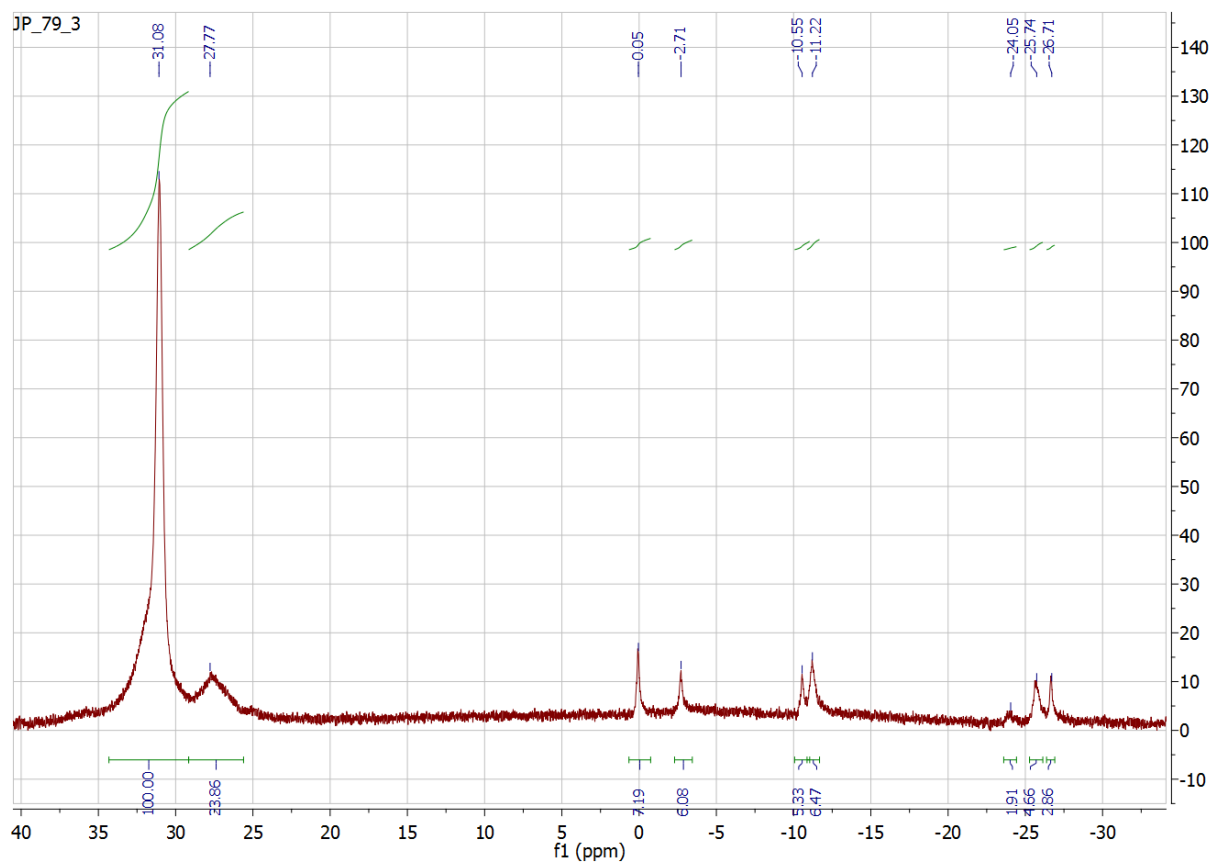

|              |          |                |          |                 |                              |
|--------------|----------|----------------|----------|-----------------|------------------------------|
| δ (ppm)      | 31.1     | 27.8           | -10.6    | -11.2           | 0, -2.71, -24.1 -25.7, -26.7 |
| Product      | Borazine | Polyborazylene | Borazane | Cyclodiborazane | Unknown                      |
| % Conversion | 59.4     | 20.1           | 3.2      | 3.8             | 13.5                         |

Open reflux schlenk Cp\*Co(CO)I<sub>2</sub> + AB

Example <sup>11</sup>B{<sup>1</sup>H} NMR spectrum, THF, borosilicate NMR tube

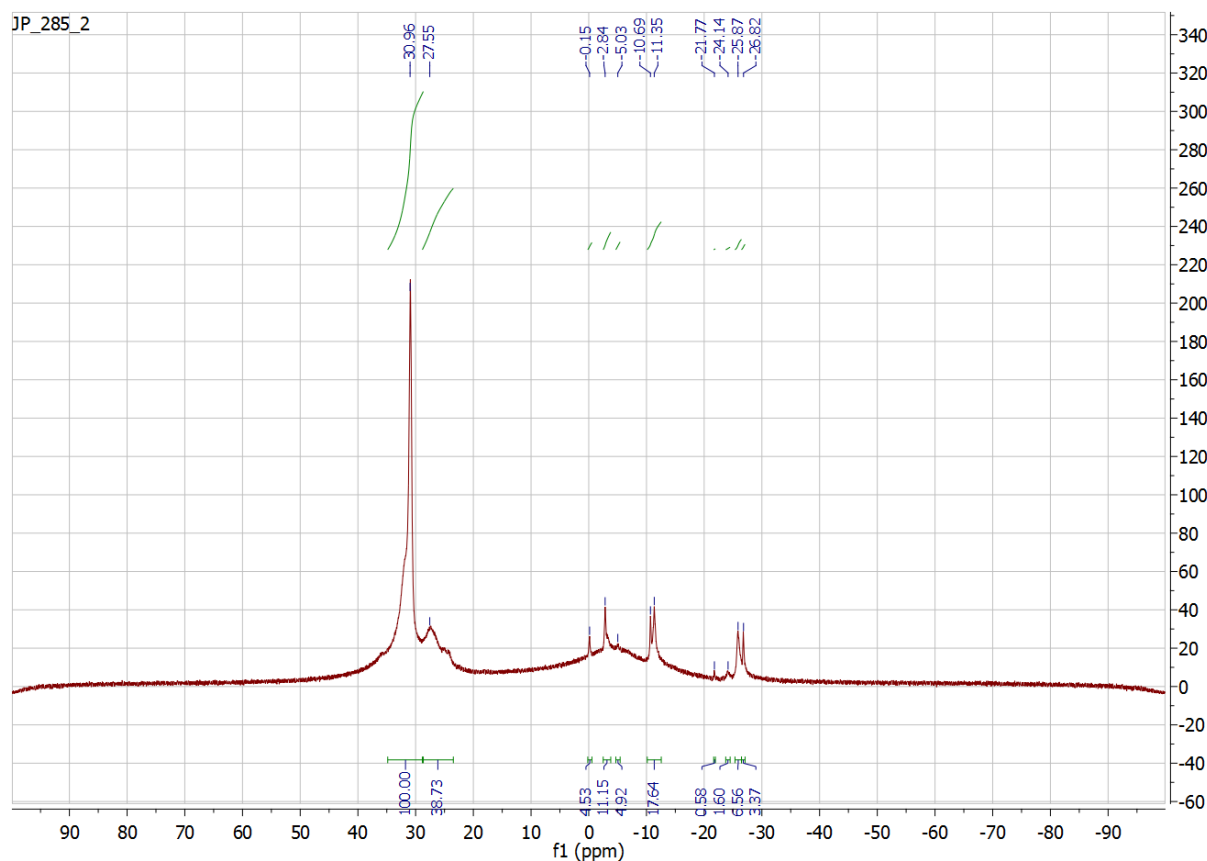

|         |          |                |          |                  |                                 |                          |
|---------|----------|----------------|----------|------------------|---------------------------------|--------------------------|
| δ (ppm) | 31.0     | 27.6           | -10.6    | -11.2            | -21.8                           | -0.3, -2.8, -25.9, -26.8 |
| Product | Borazine | Polyborazylene | Borazane | Cyclo-diborazane | NH <sub>3</sub> BH <sub>3</sub> | Unknown                  |
| %       | 50.1     | 30.1           | ~3       | ~4               | <0.1                            | 7.0                      |

*B*-(cyclo-diborazanyl)aminoborohydride (δ -5.0, -11.4, -24.1) appears to be present but overlapping resonance with cyclo-diborazane and low intensity resonances make an assessment of concentration difficult.

## H<sub>2</sub> collection NMR spectra

<sup>1</sup>H NMR spectrum – final, THF-*d*<sub>8</sub> quartz NMR tube

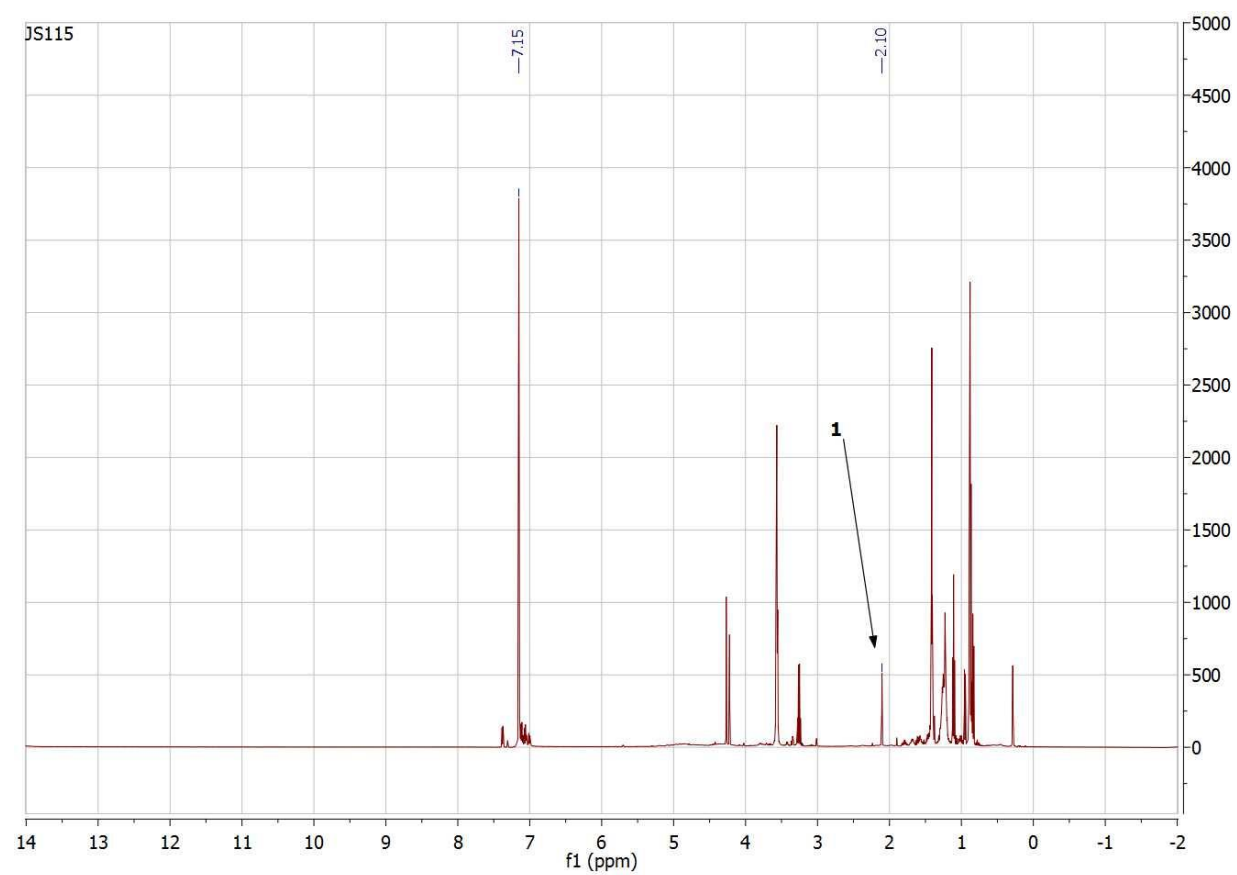

$^{11}\text{B}\{^1\text{H}\}$  NMR spectrum – final, THF- $d_8$  quartz NMR tube

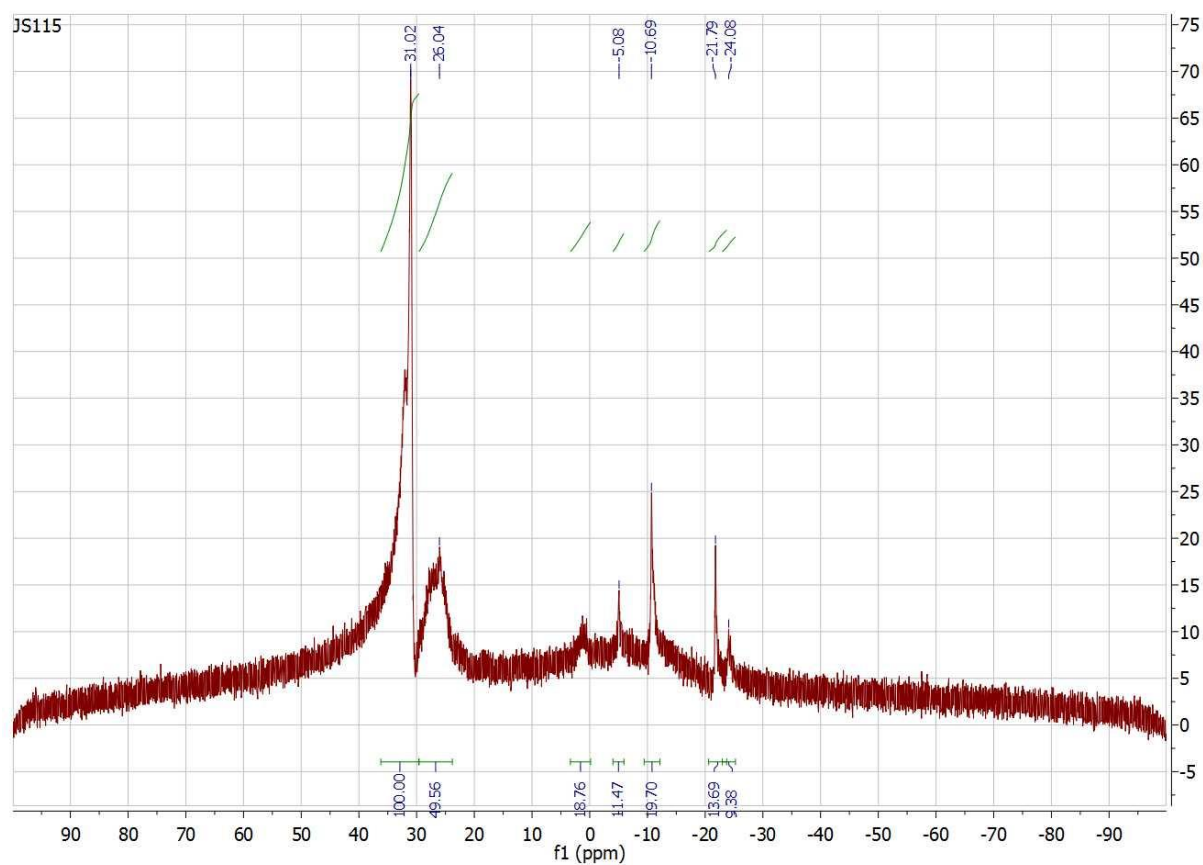

|                |          |                |                                                  |                          |
|----------------|----------|----------------|--------------------------------------------------|--------------------------|
| $\delta$ (ppm) | 31.0     | 26.0           | -5.1, -10.7, -24.1                               | -21.8                    |
| Product        | Borazine | Polyborazylene | <i>B</i> -<br>(cyclodiborazanyl)aminoborohydride | $\text{NH}_3\text{BH}_3$ |
| % Conversion   | 45.0     | 29.5           | 20.3                                             | 5.2                      |

# IR spectrum for H<sub>2</sub> collection experiment

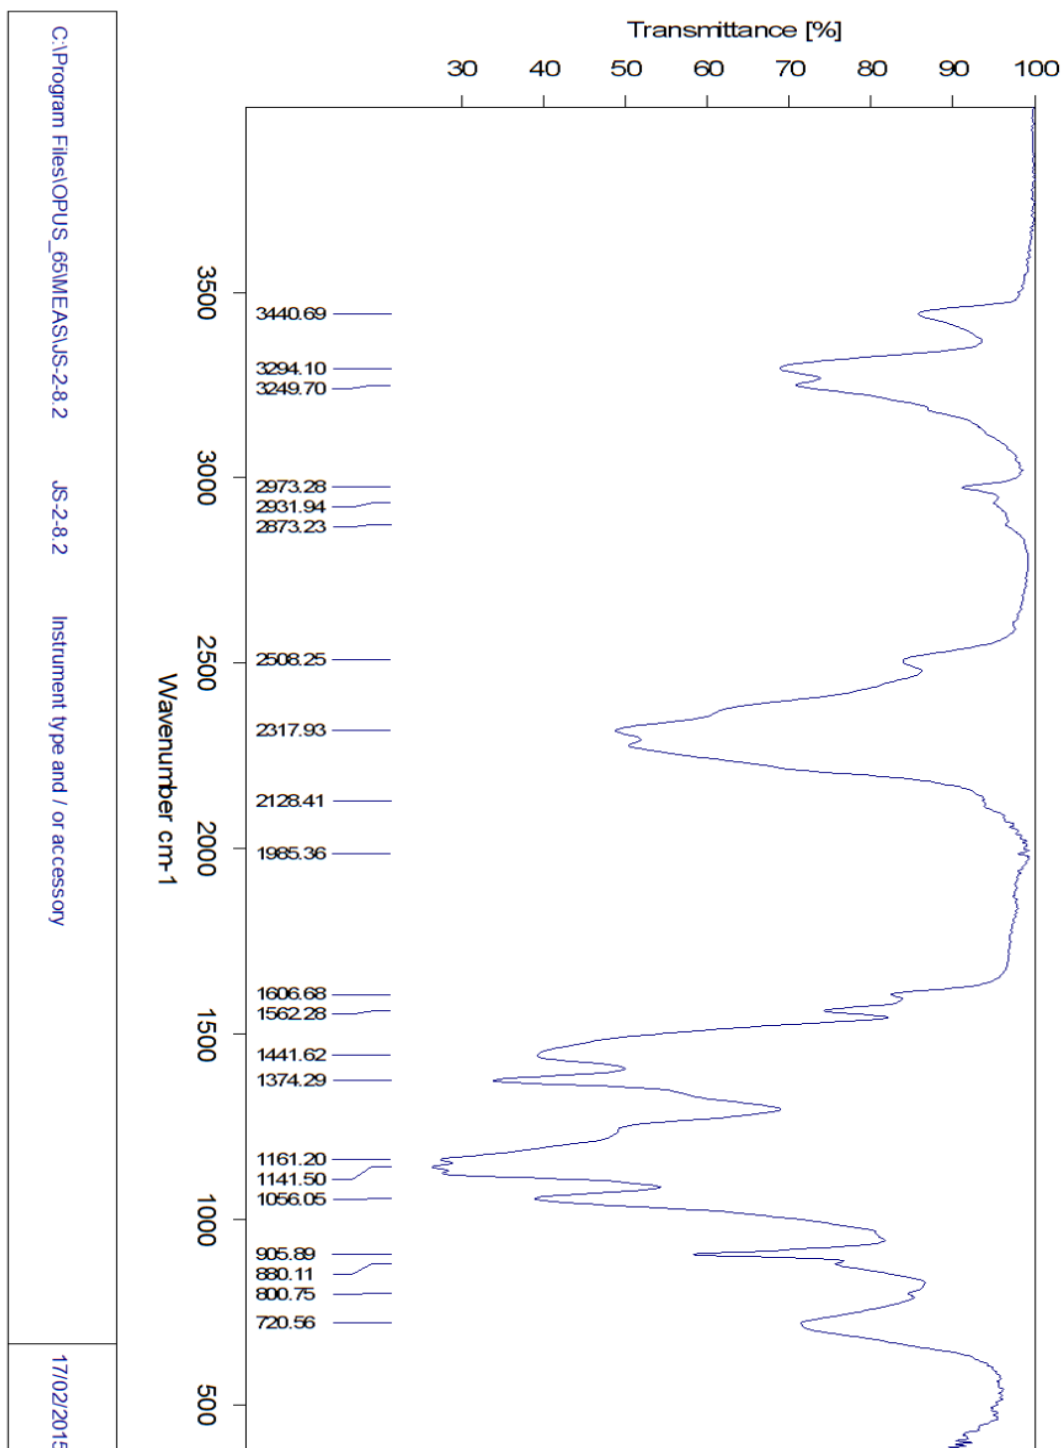

## Control reaction

Reaction conditions: 0.40 mL  $\text{NH}_3\text{BH}_3$  (2.0 M in THF), 65 °C, 7 d

$^{11}\text{B}\{^1\text{H}\}$  NMR spectrum, quartz tube, THF

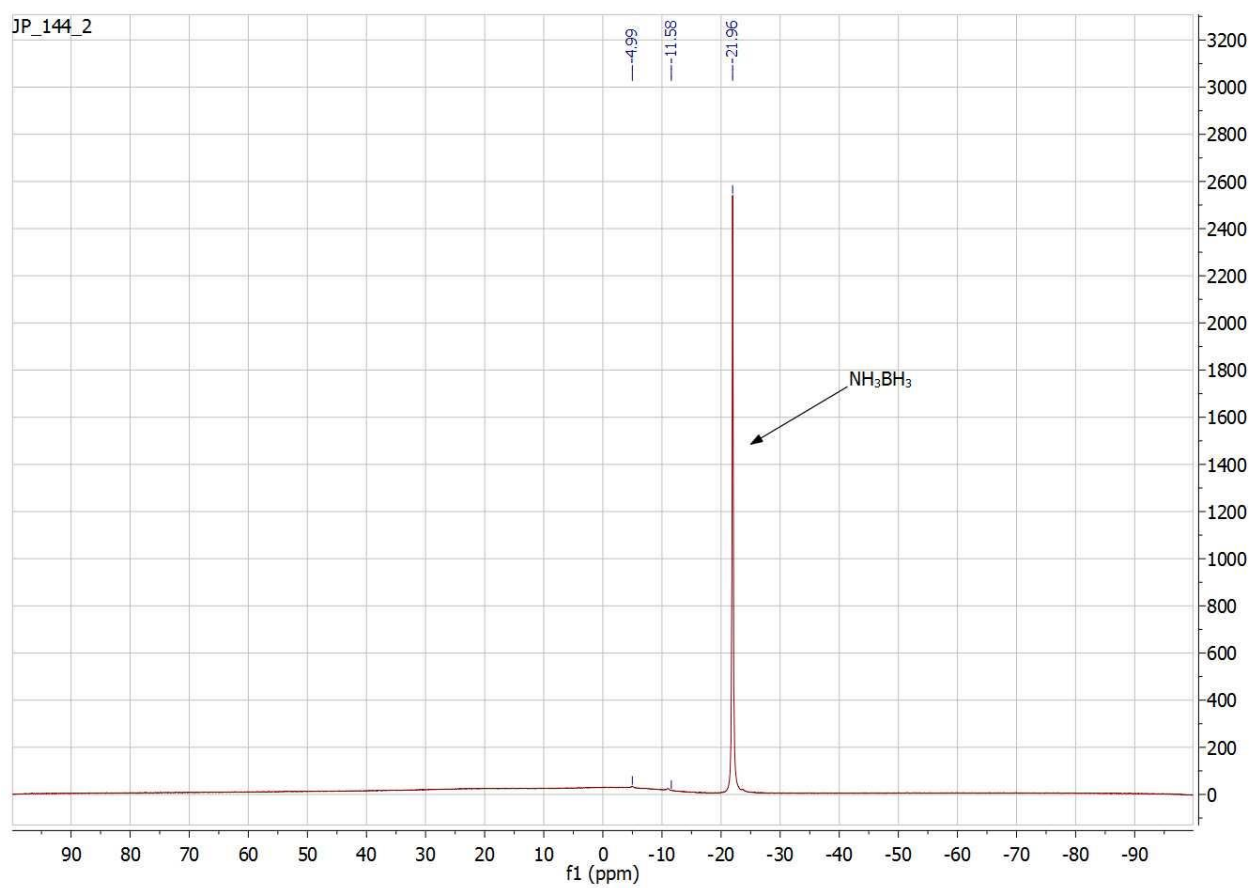

Cp\*Co(CO)I<sub>2</sub> + AB + Styrene

<sup>13</sup>C{<sup>1</sup>H} NMR spectra – Initial, THF

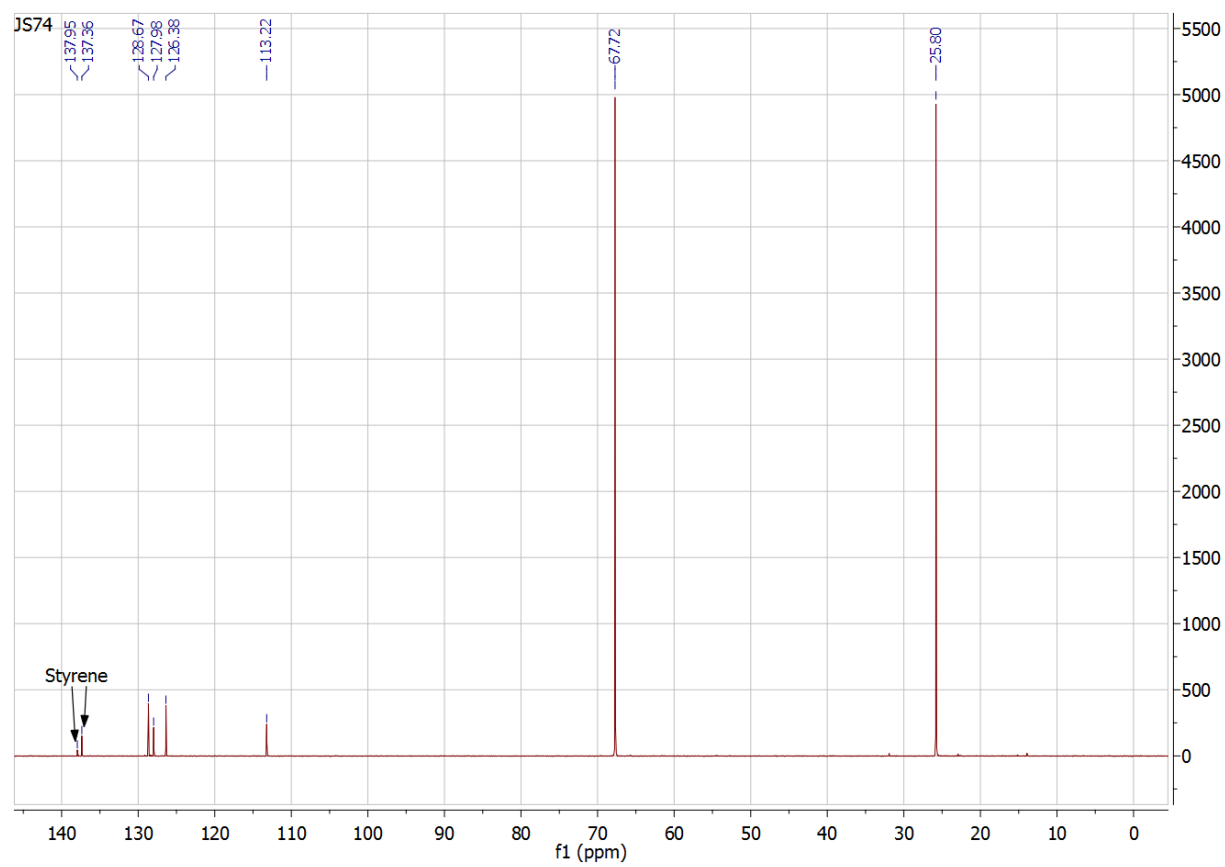

$^{13}\text{C}\{^1\text{H}\}$  NMR spectrum –Final, THF

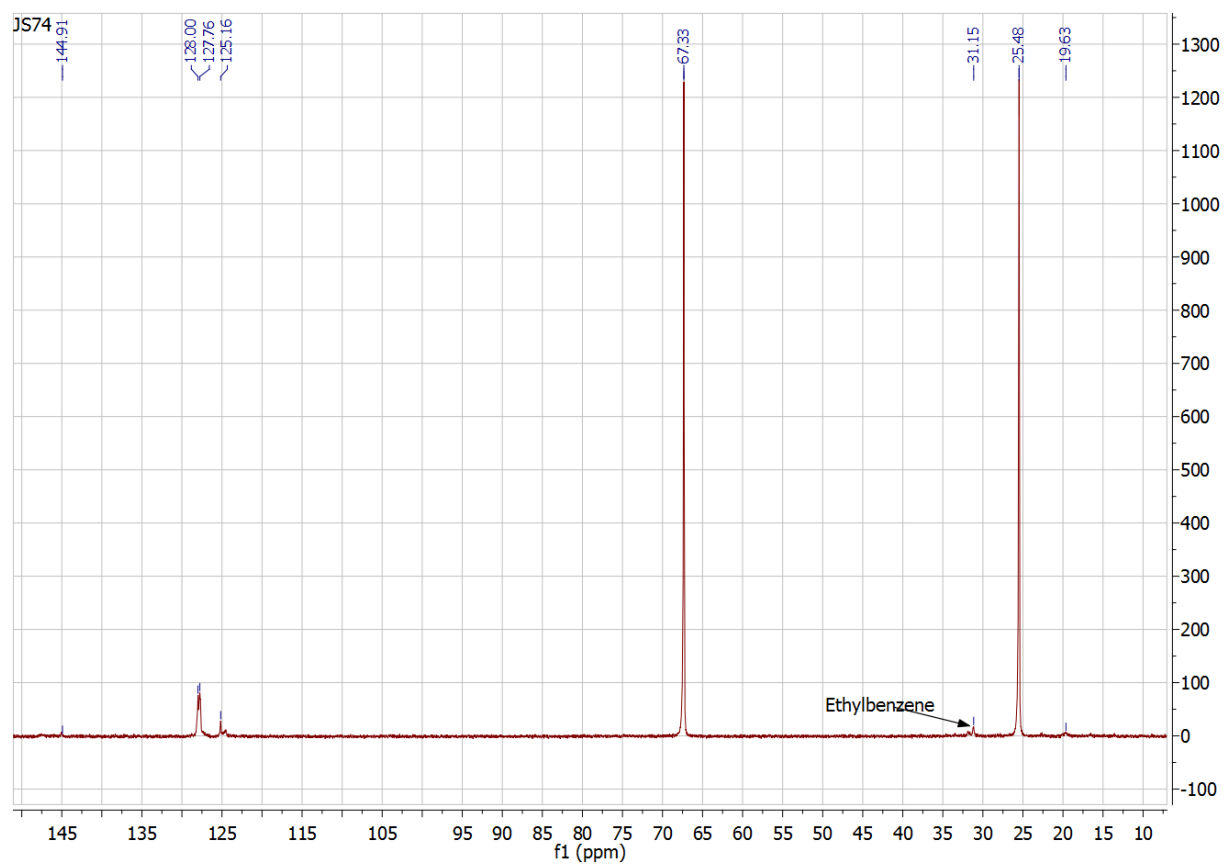



$^{11}\text{B}\{^1\text{H}\}$  NMR spectrum – Final, THF, borosilicate glass NMR tube

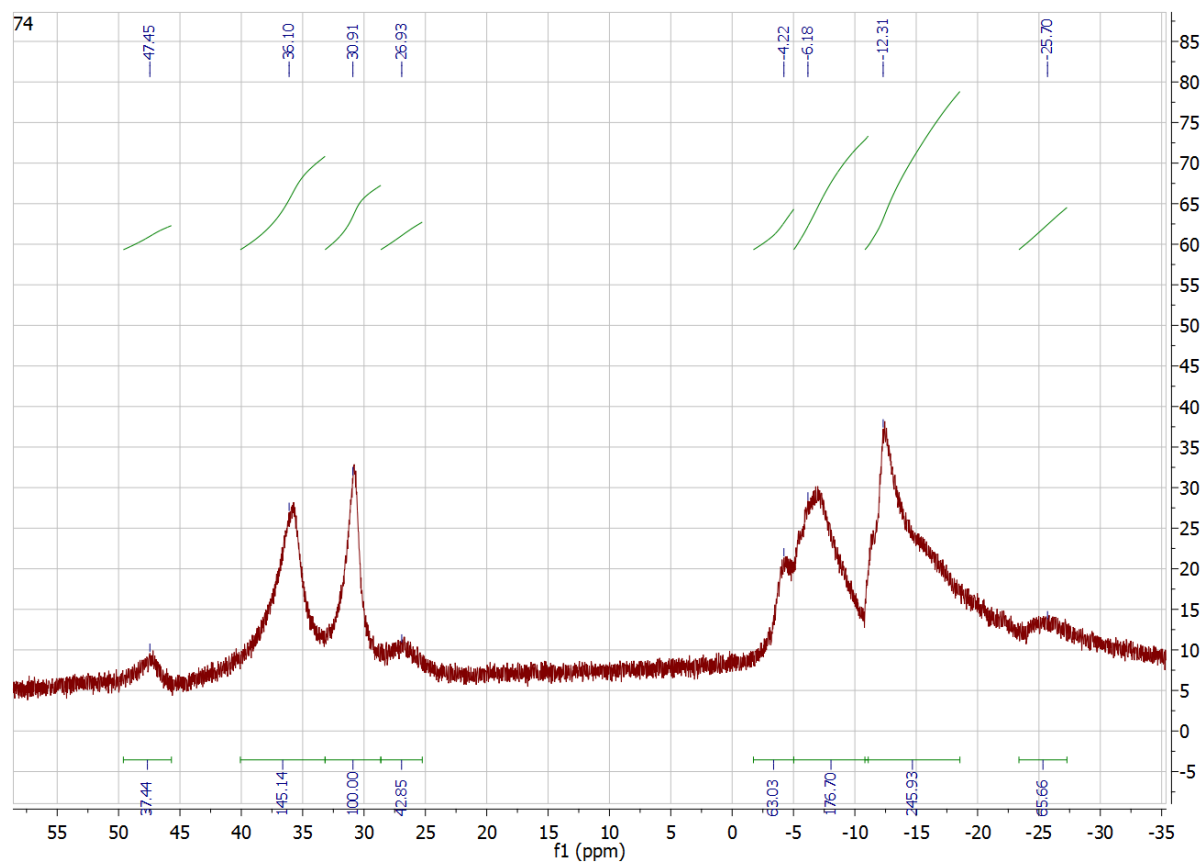

| $\delta$ (ppm) | 47.5                   | 36.1, -25.7     | 30.9     | 26.9           | -4.2, -6.2, -12.3 |
|----------------|------------------------|-----------------|----------|----------------|-------------------|
| Product        | Hydroborlyated species | Polyaminoborane | Borazine | Polyborazalyne | Unknown products  |
| % Conversion   | 4.2                    | 24.2            | 11.4     | 4.9            | 55.3              |

# GC Spectrum

## MS Data Review Active Chromatogram Plot - 1/6/2015 8:03 AM

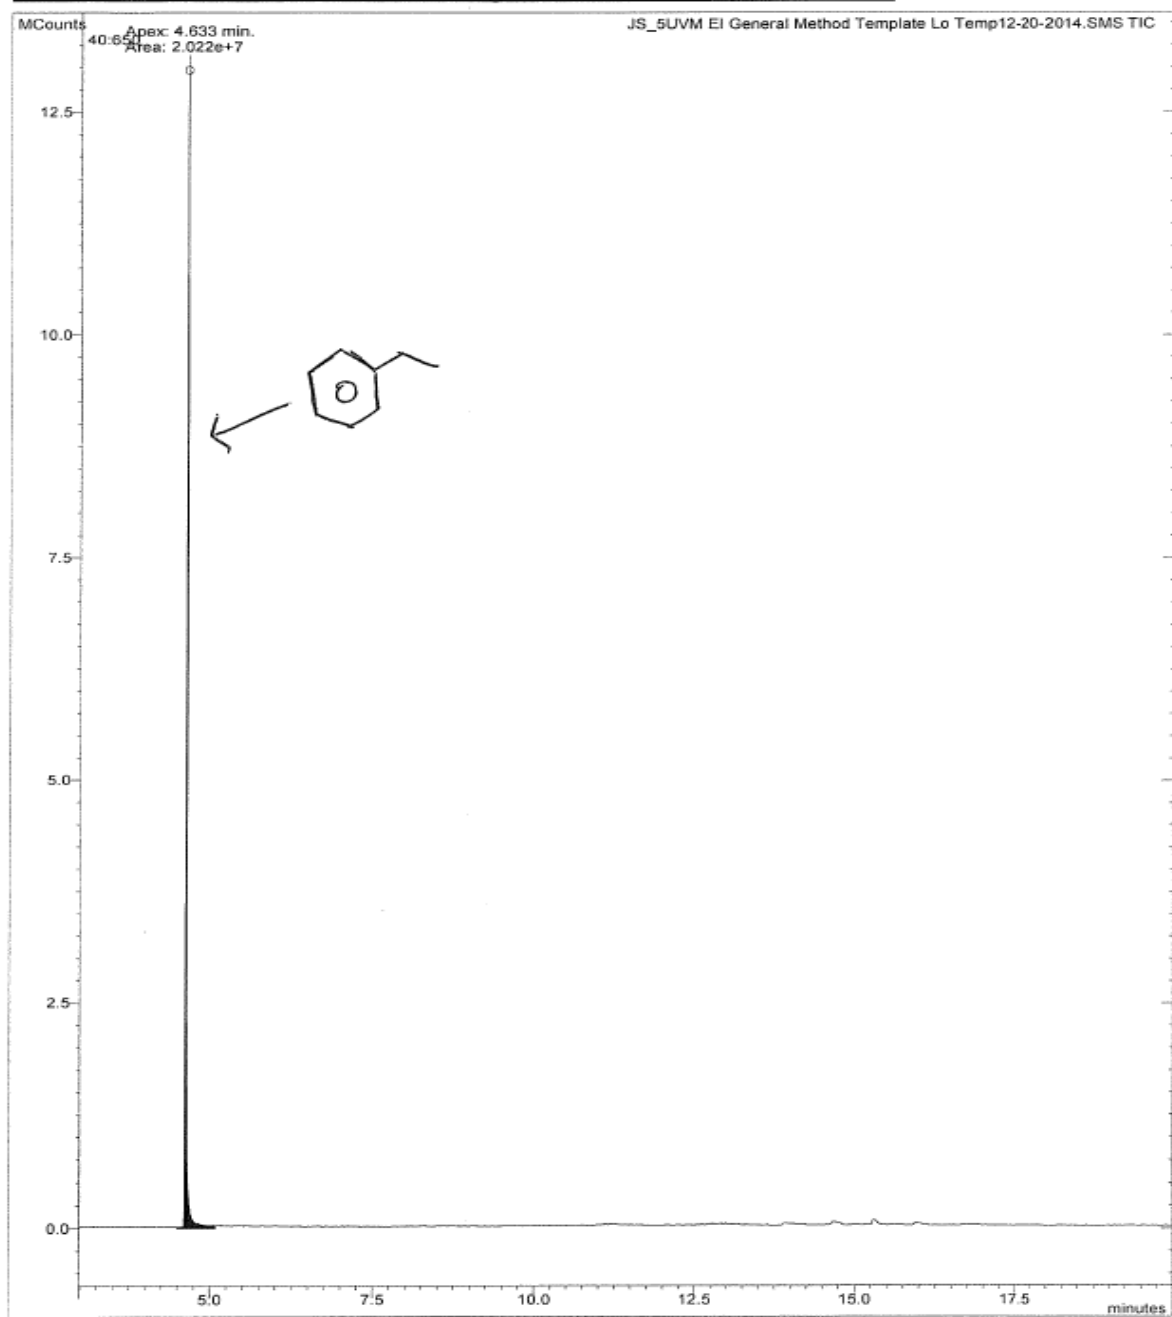

Cp\*Co(CO)I<sub>2</sub> + AB + *tert*-butylethylene

<sup>13</sup>C{<sup>1</sup>H} NMR spectrum – initial, THF

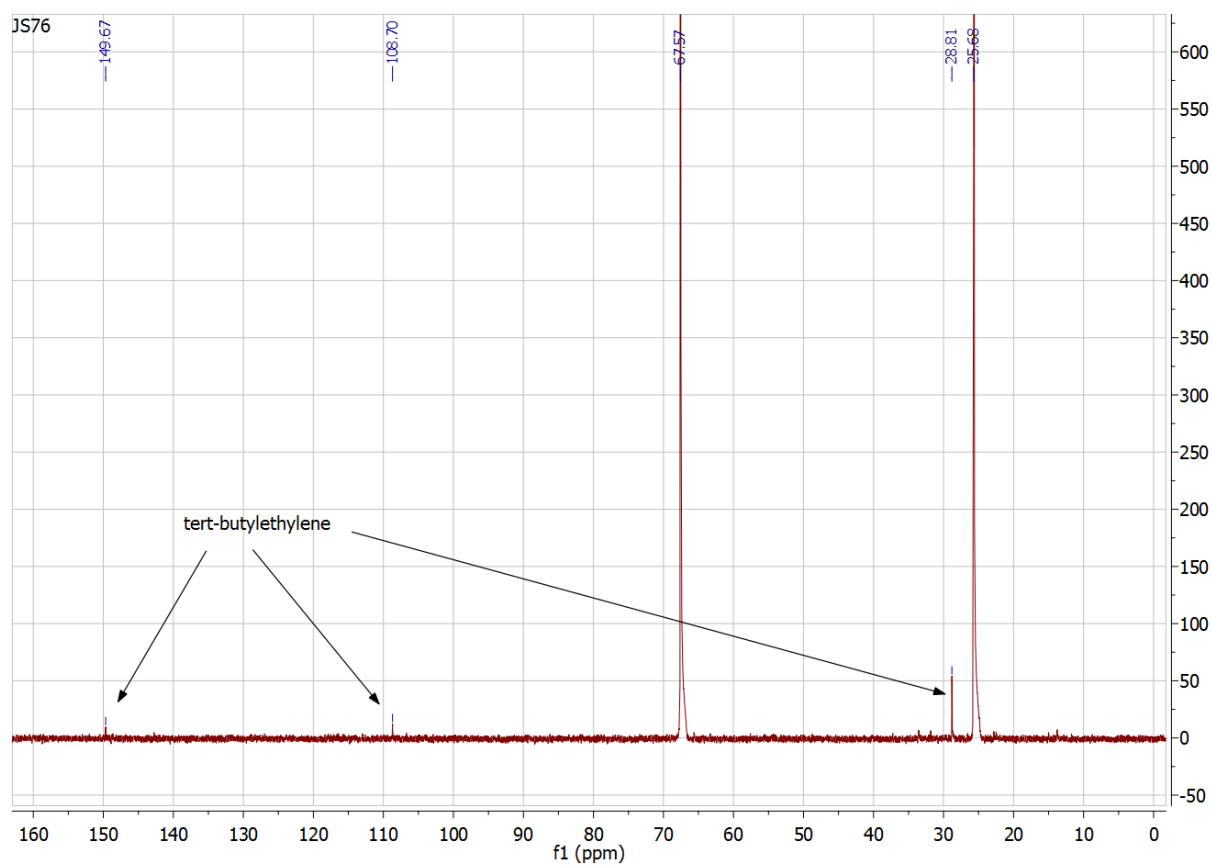

$^{13}\text{C}\{^1\text{H}\}$  NMR spectrum – final, THF

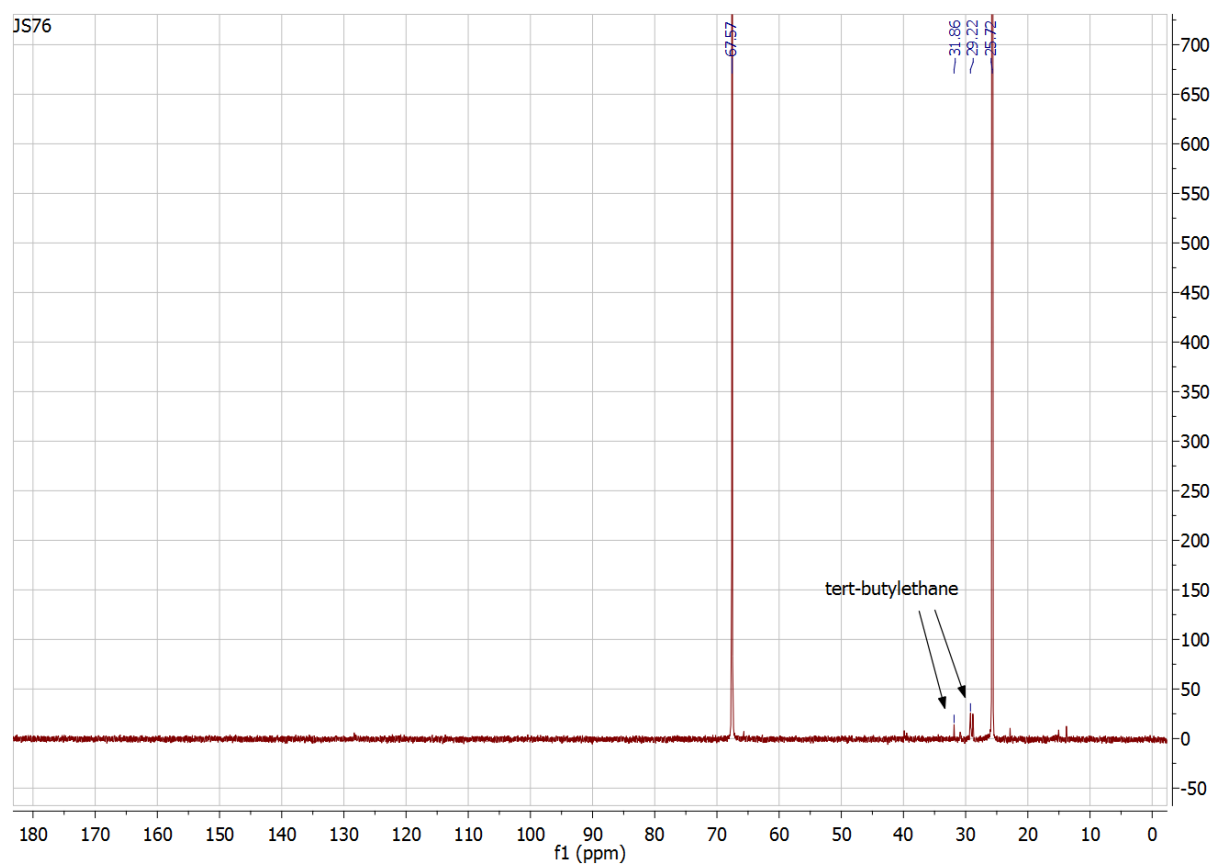

$^{11}\text{B}\{^1\text{H}\}$  NMR spectrum – final, THF, borosilicate glass NMR tube

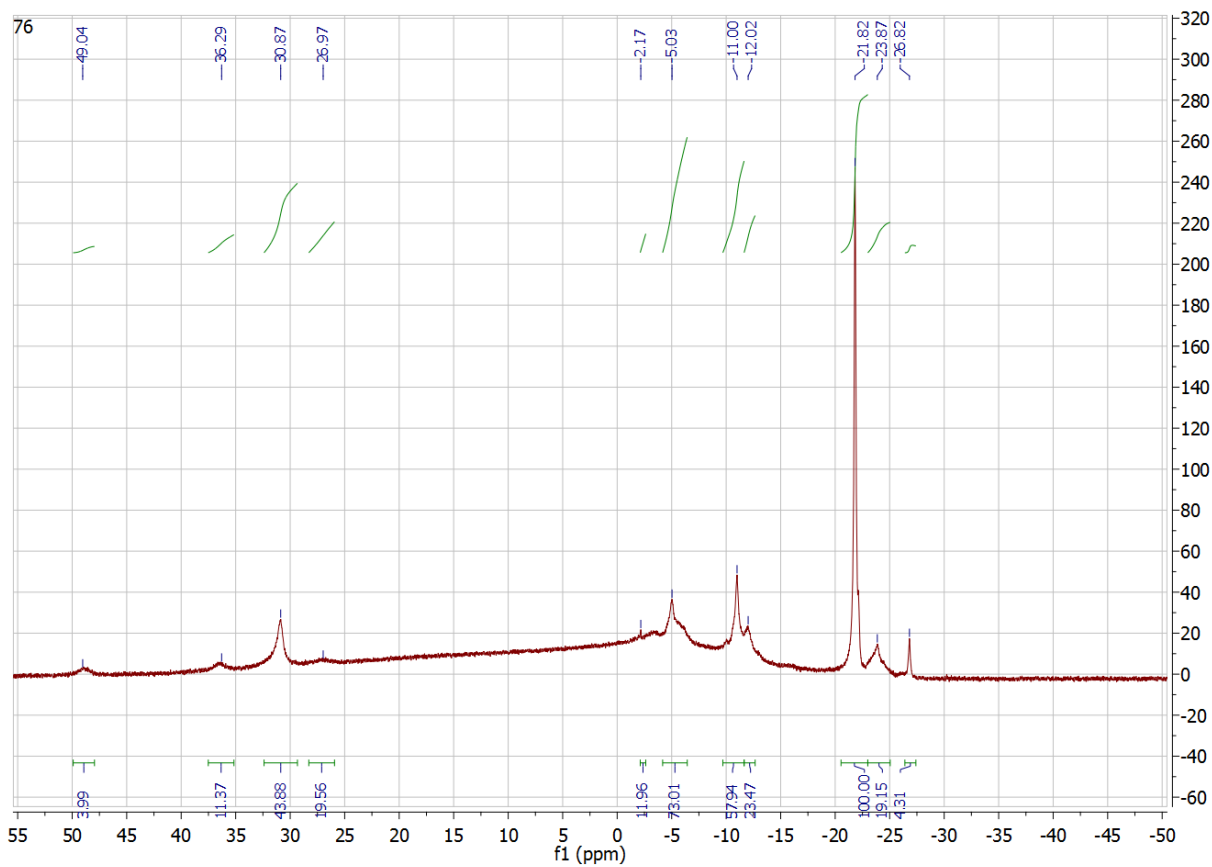

| $\delta$ (ppm) | 49.0                   | 36.3, -26.8     | 30.9     | 27.0           | -5.0, -11.0, -23.9                           | -21.8                    | -2.2, -12.0 |
|----------------|------------------------|-----------------|----------|----------------|----------------------------------------------|--------------------------|-------------|
| Product        | Hydroborylated species | Polyaminoborane | Borazine | Polyborazylene | <i>B</i> -(cyclodiborazanyl)aminoborohydride | $\text{NH}_3\text{BH}_3$ | Unknown     |
| % Conversion   | 1.1                    | 4.3             | 11.9     | 5.3            | 40.7                                         | 27.1                     | 9.6         |

# GC Spectrum

## MS Data Review Active Chromatogram Plot - 1/6/2015 8:04 AM

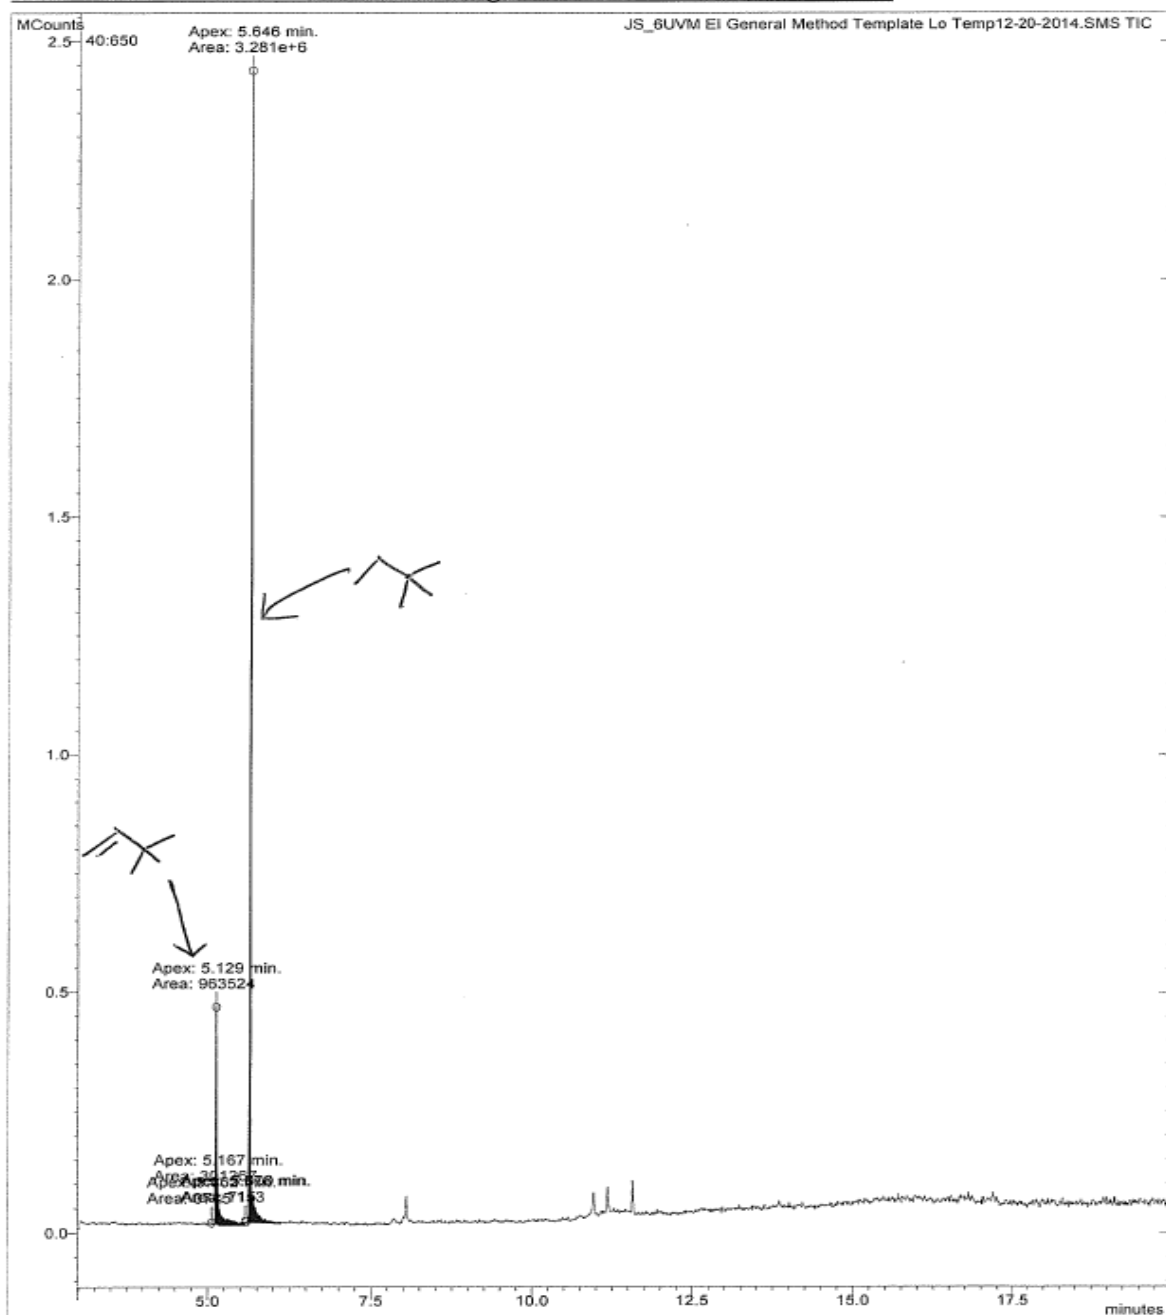

Cp\*Co(CO)I<sub>2</sub> + AB + Diphenylacetylene

<sup>13</sup>C{<sup>1</sup>H} NMR spectrm – initial, THF

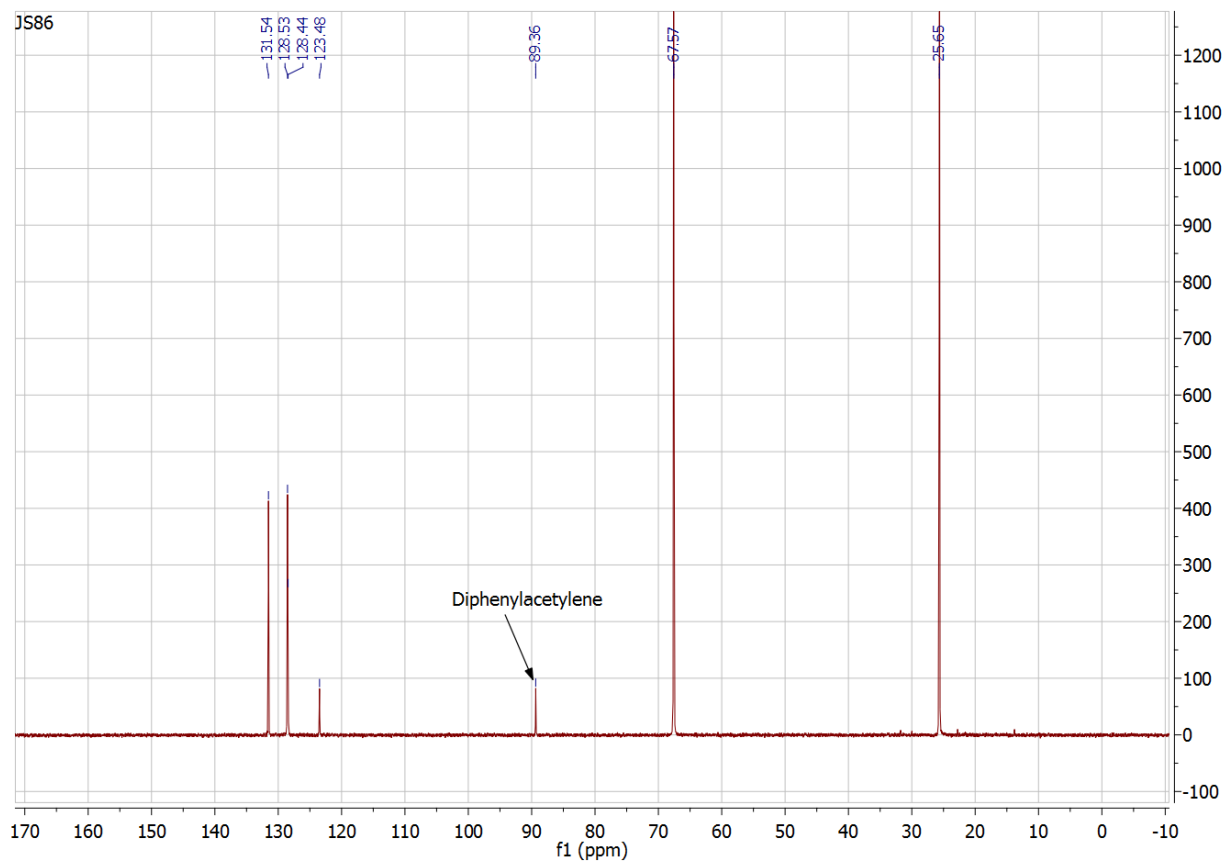

$^{13}\text{C}\{^1\text{H}\}$  NMR spectrum – final, THF

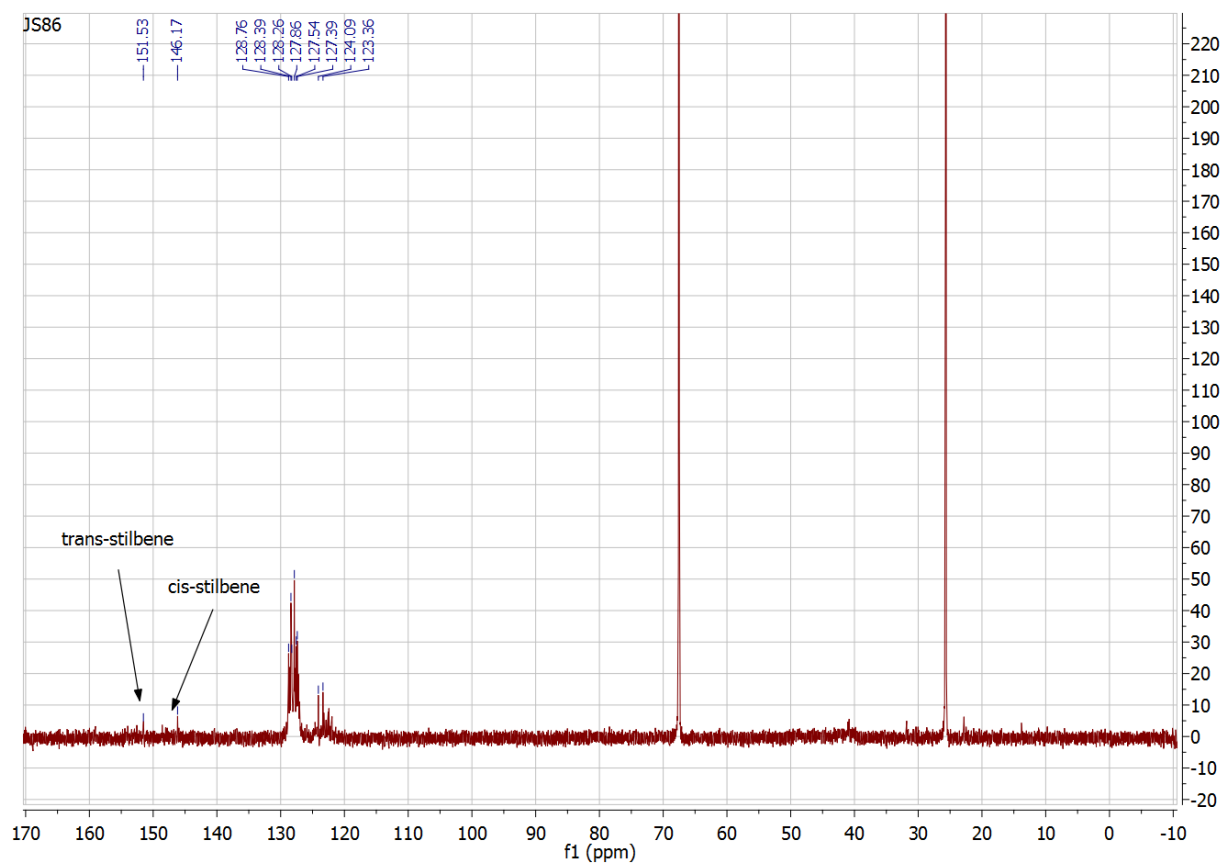



$^{11}\text{B}\{^1\text{H}\}$  NMR spectrum – final, THF, borosilicate NMR tube

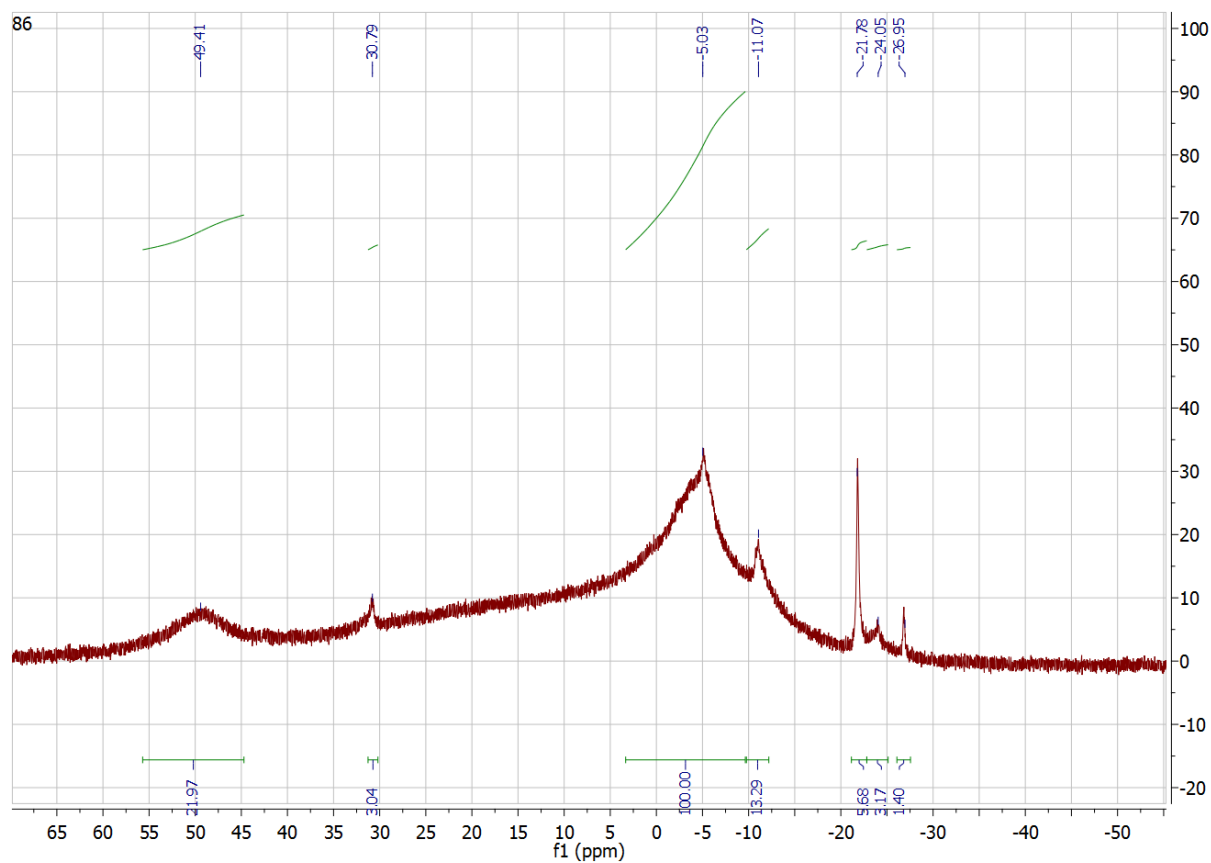

| $\delta$ (ppm) | 49.4                   | 30.8            | -5.0, -11.1, -24.1                            | -21.8                    | -27.0   |
|----------------|------------------------|-----------------|-----------------------------------------------|--------------------------|---------|
| Product        | Hydroborylated species | Polyaminoborane | <i>B</i> -(cyclodiborazany l)aminoborohydride | $\text{NH}_3\text{BH}_3$ | Unknown |
| % Conversion   | 14.6                   | 2.0             | 78.4                                          | 3.8                      | 1.2     |

GC spectrum

MS Data Review Active Chromatogram Plot - 1/6/2015 8:05 AM

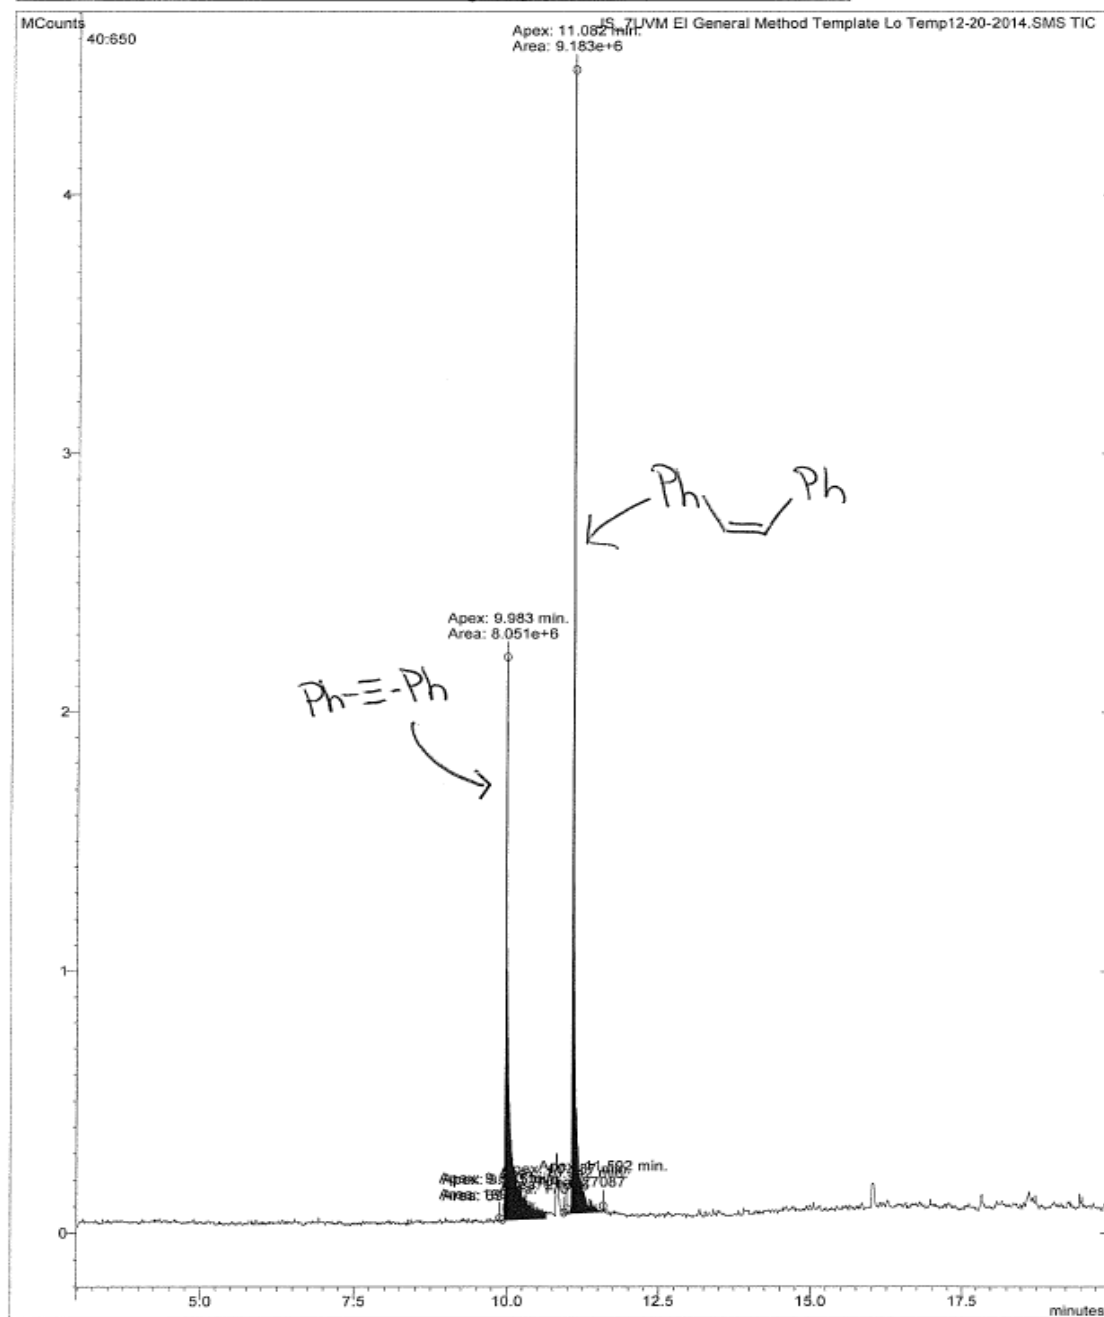

Cp\*Co(CO)I<sub>2</sub> + AB + cis-cyclooctene

<sup>13</sup>C{<sup>1</sup>H} NMR spectrum – initial, THF

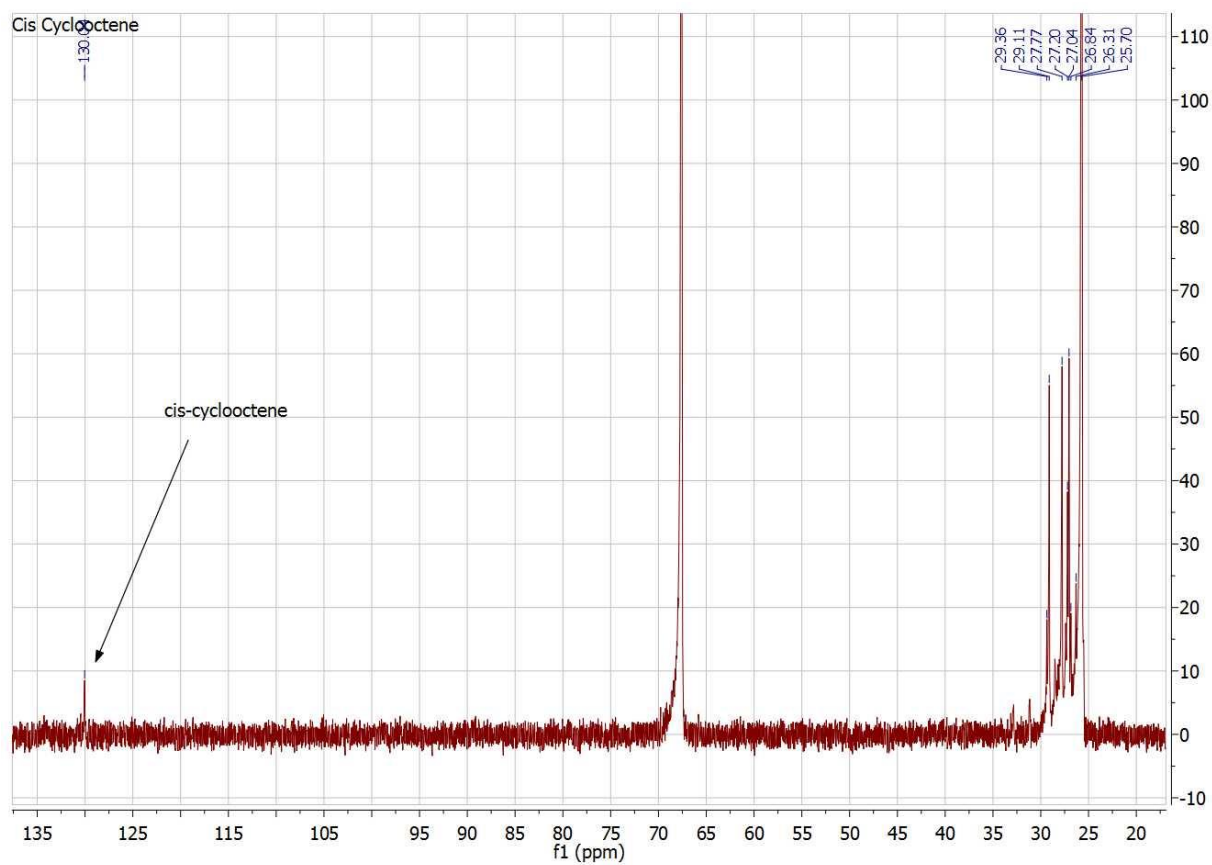

$^{13}\text{C}\{^1\text{H}\}$  NMR spectrum – final, THF

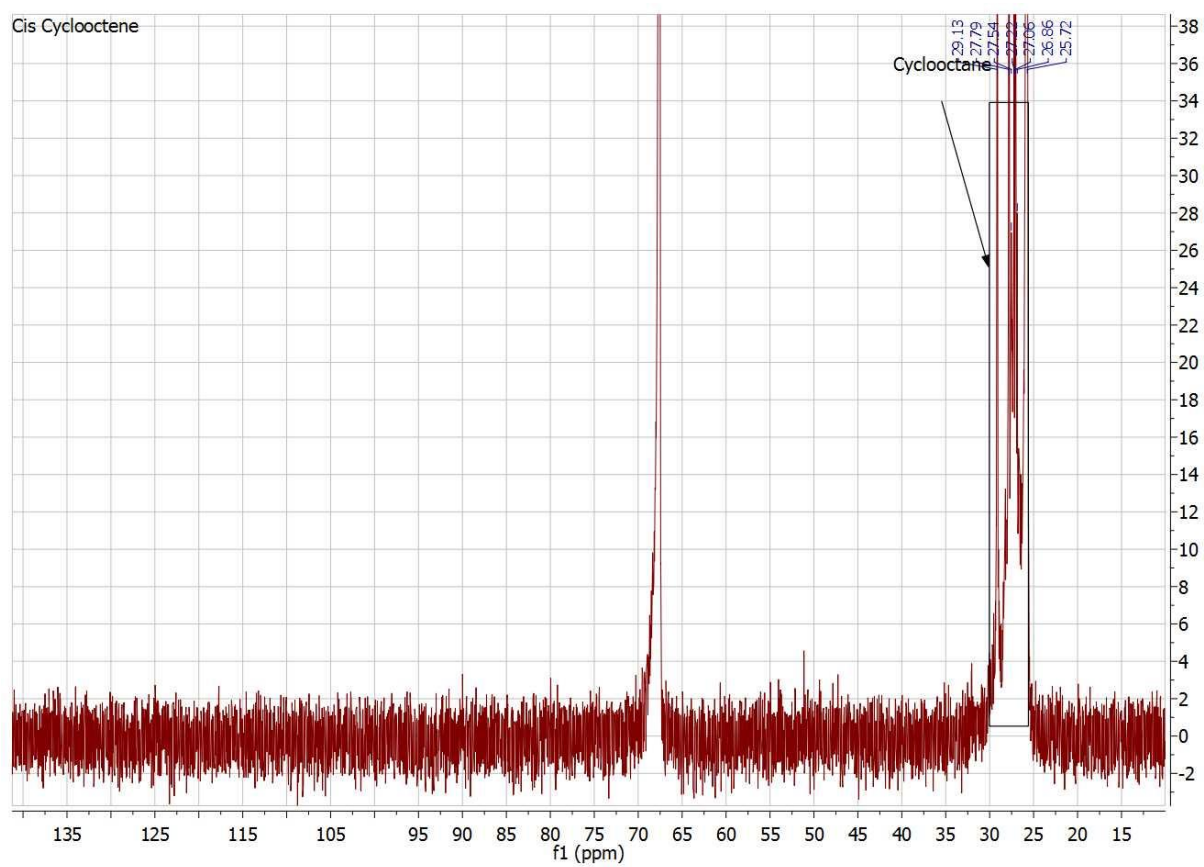

$^{11}\text{B}\{^1\text{H}\}$  NMR spectrum – final, THF, borosilicate NMR tube

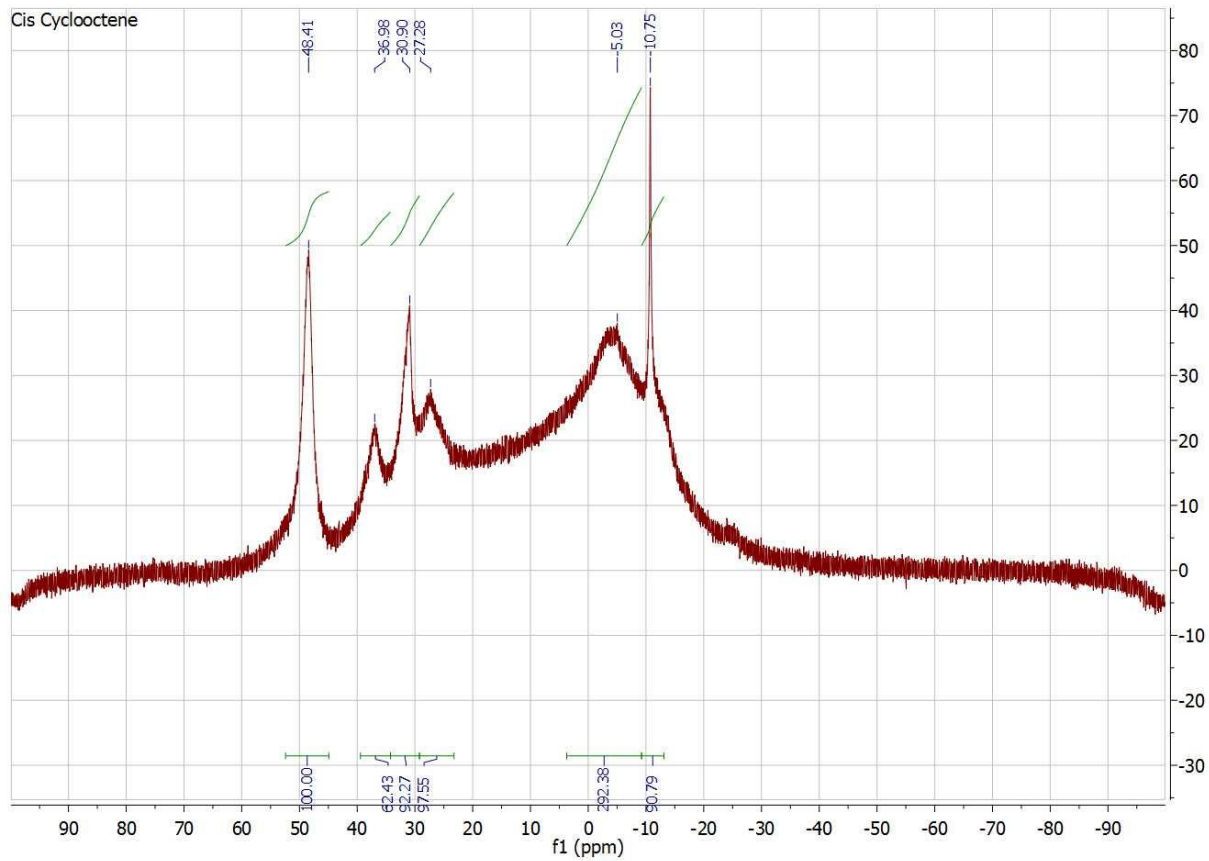

| $\delta$ (ppm) | 48.4                   | 37.0            | 30.9     | 27.3           | -10.8    | -5.0    |
|----------------|------------------------|-----------------|----------|----------------|----------|---------|
| Product        | Hydroborylated species | Polyaminoborane | Borazine | Polyborazylene | Borazane | Unknown |
| % Conversion   | 15.7                   | 9.9             | 14.5     | 15.4           | 14.3     | 30.2    |

GC spectrum

MS Data Review Active Chromatogram Plot - 1/6/2015 8:03 AM

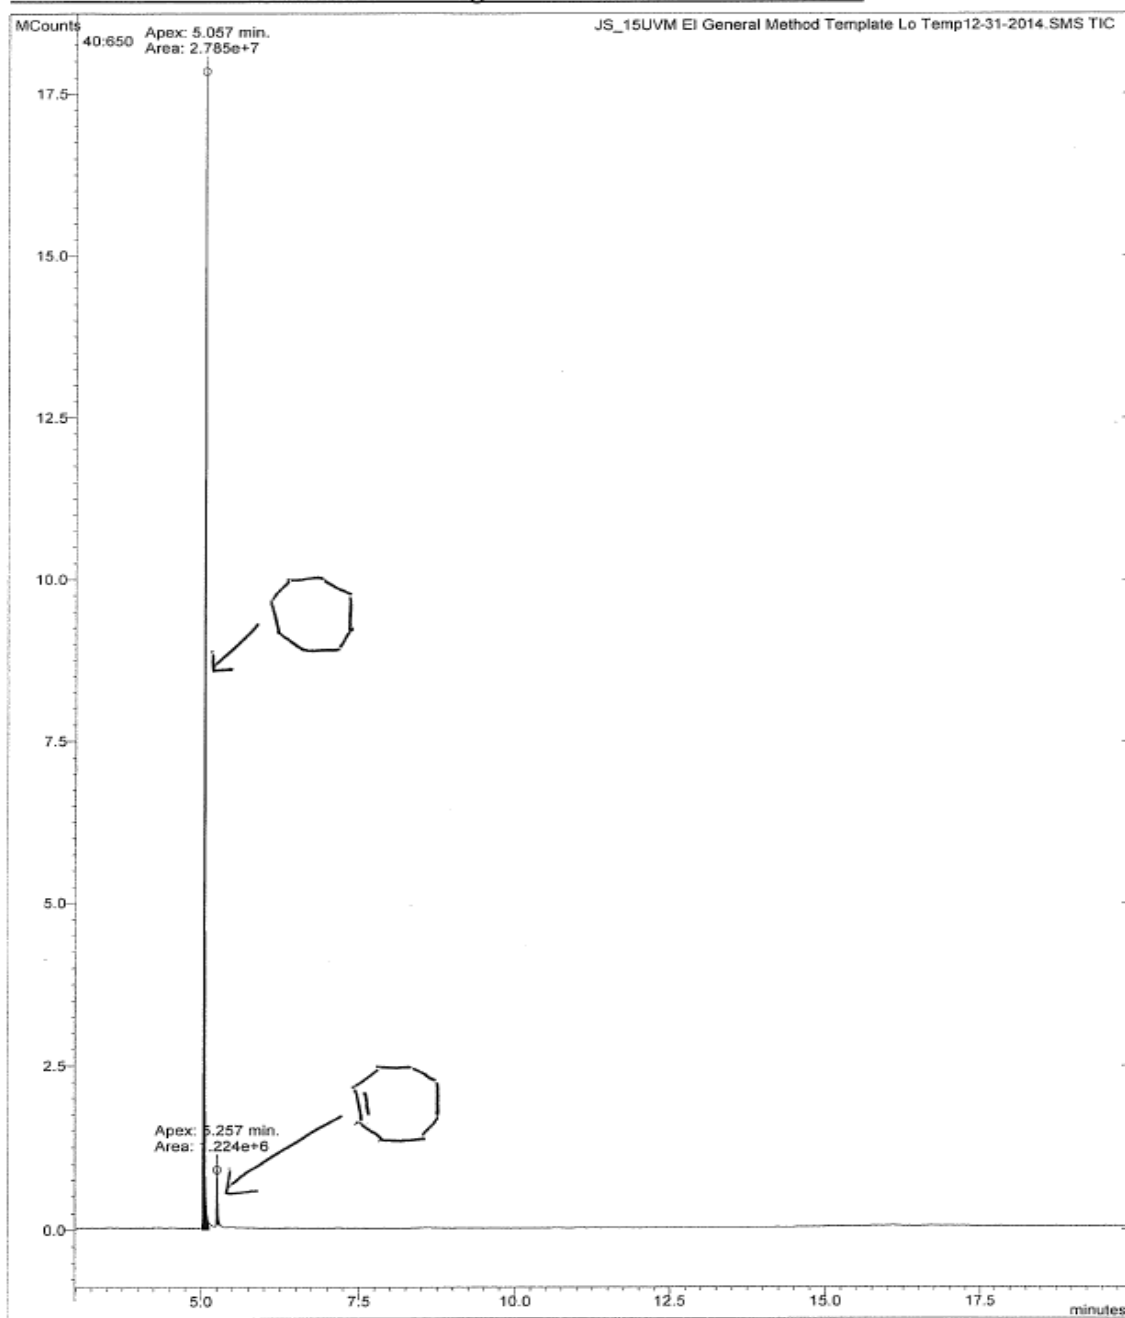

Cp\*Co(CO)I<sub>2</sub> + AB + Phenylacetylene

<sup>13</sup>C{<sup>1</sup>H} NMR spectrum – final, THF

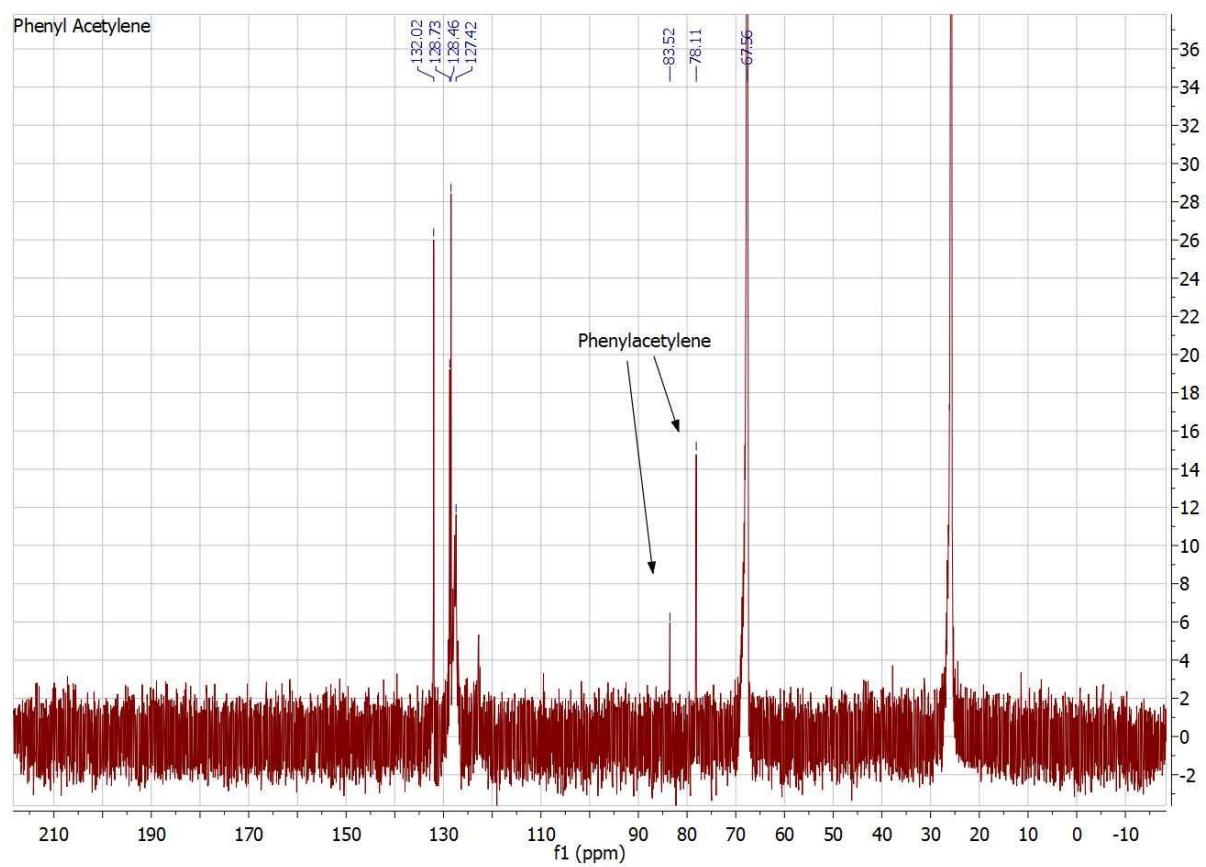

$^{13}\text{C}\{^1\text{H}\}$  NMR spectrum – final, THF

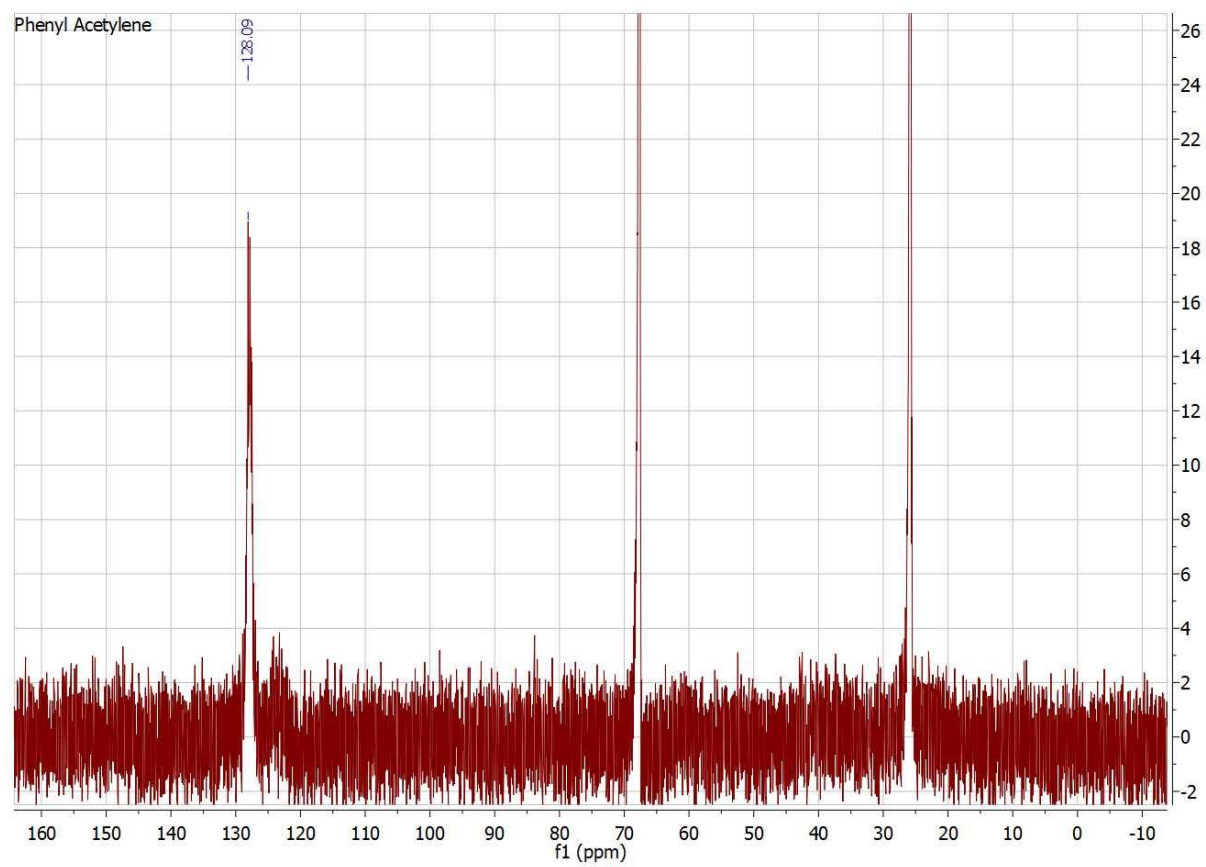



$^{11}\text{B}\{^1\text{H}\}$  NMR spectrum – final, THF, borosilicate NMR tube

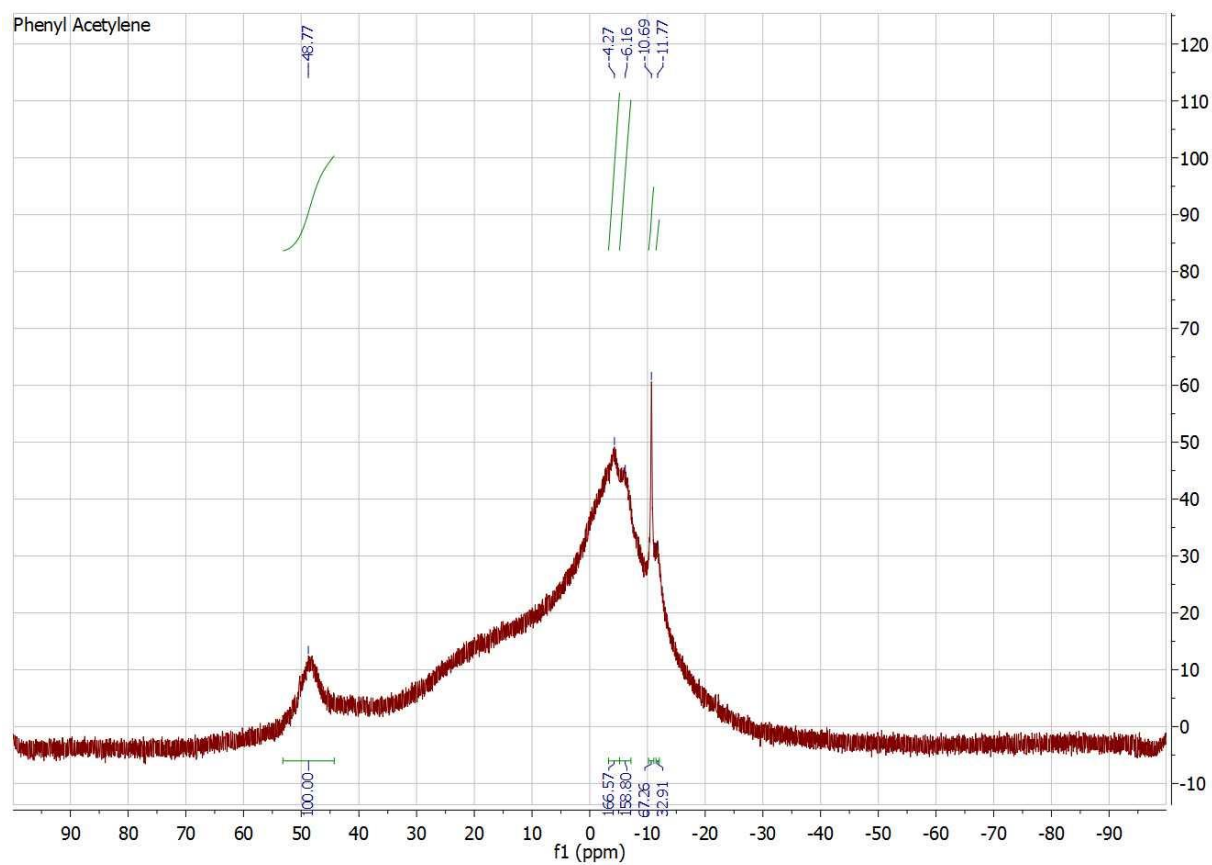

| $\delta$ (ppm) | 48.8                   | -10.7    | -11.8           | -4.3, -6.2 |
|----------------|------------------------|----------|-----------------|------------|
| Product        | Hydroborylated Species | Borazane | Cyclodiborazane | Unknown    |
| % Conversion   | 19.0                   | 31.7     | 30.2            | 19.1       |

GC spectrum

MS Data Review Active Chromatogram Plot - 1/6/2015 8:05 AM

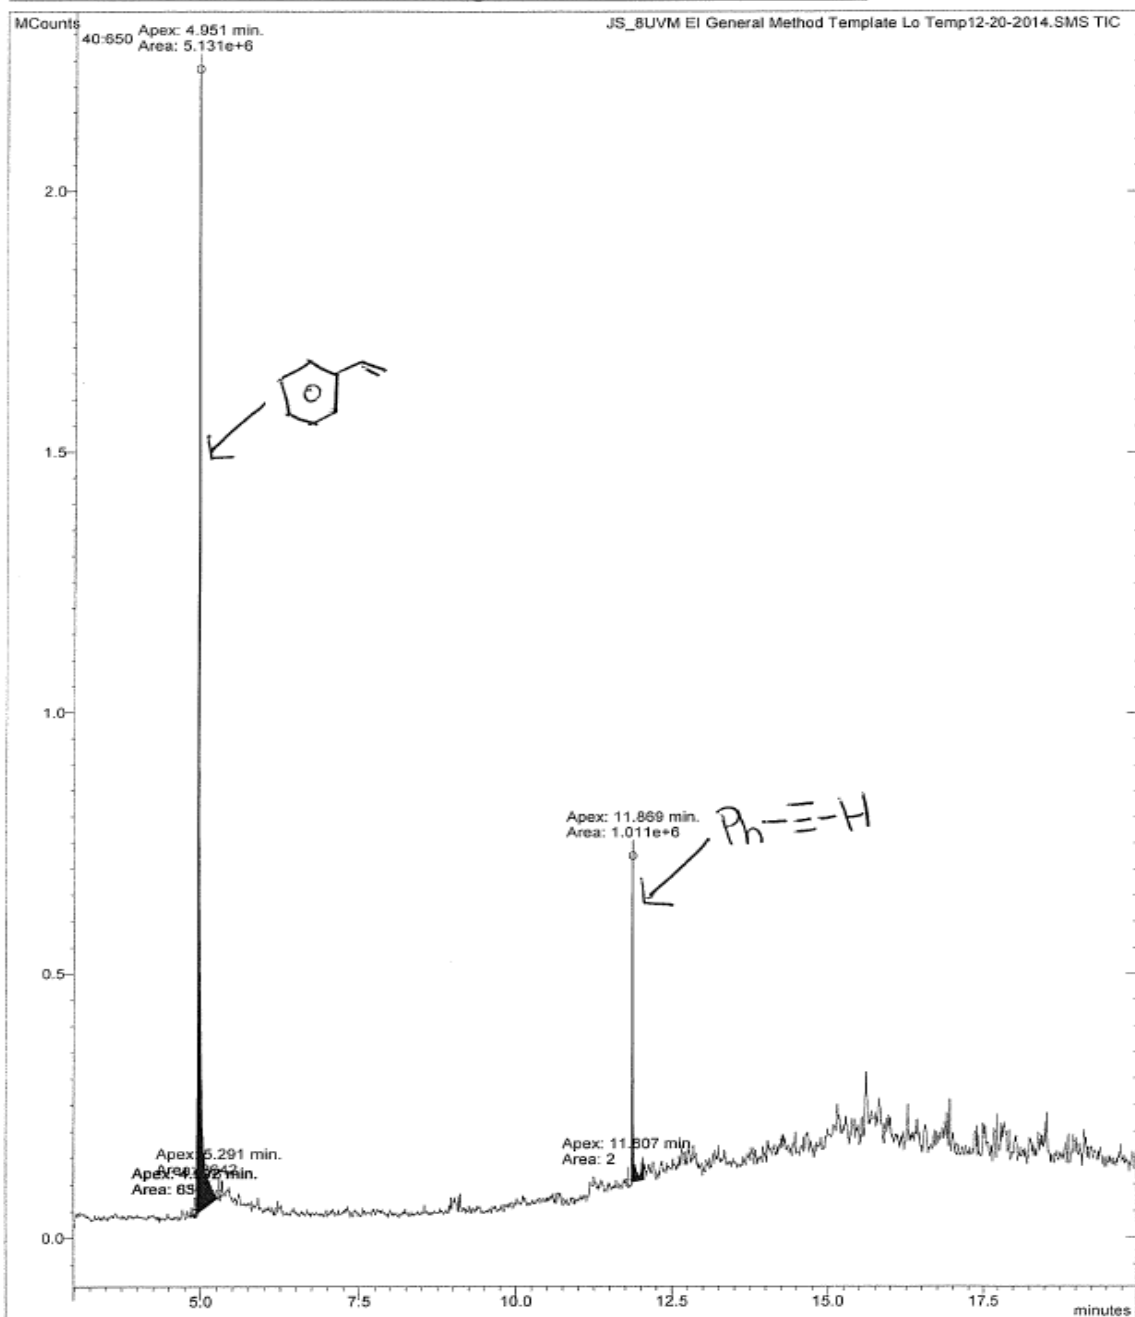

Cp\*Co(CO)I<sub>2</sub> + AB + 2-vinylpyridine

<sup>13</sup>C{<sup>1</sup>H} NMR spectrum – initial, THF

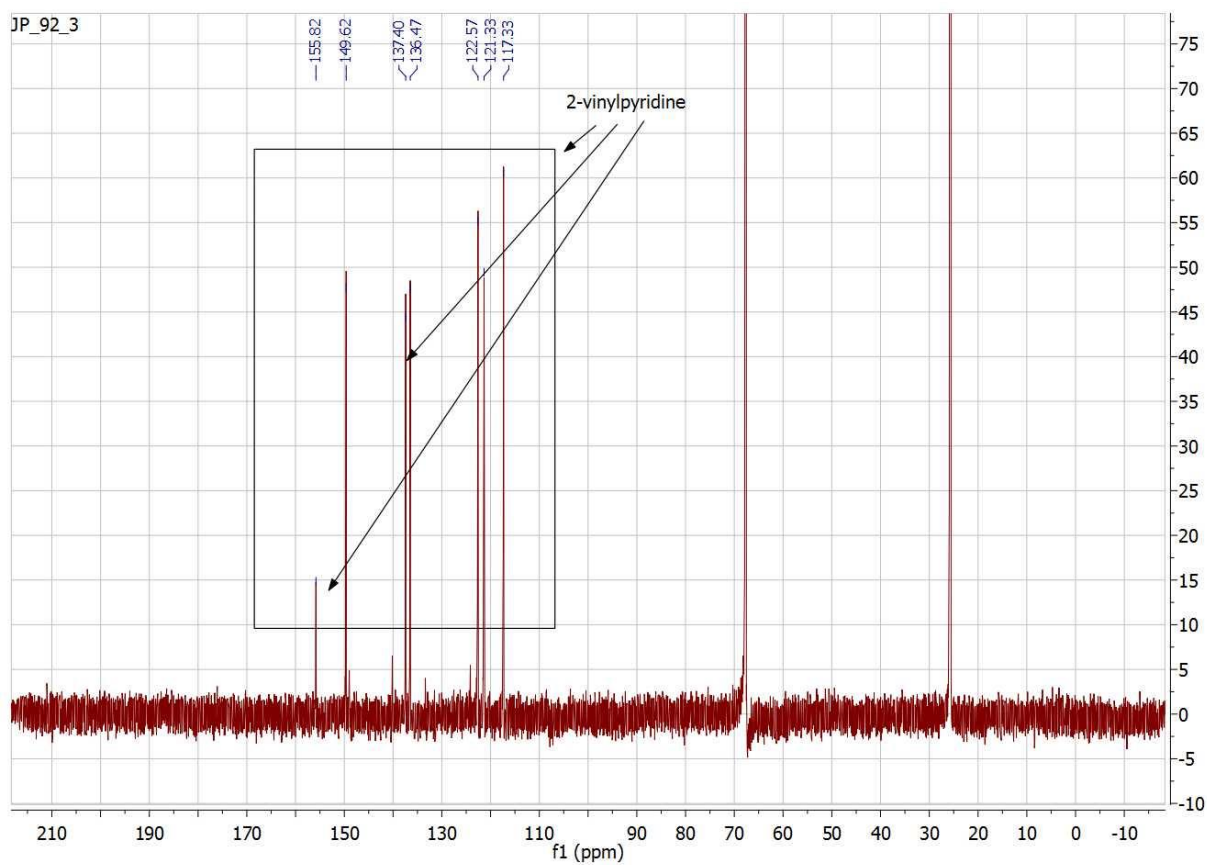

$^{13}\text{C}\{^1\text{H}\}$  NMR spectrum – final, THF

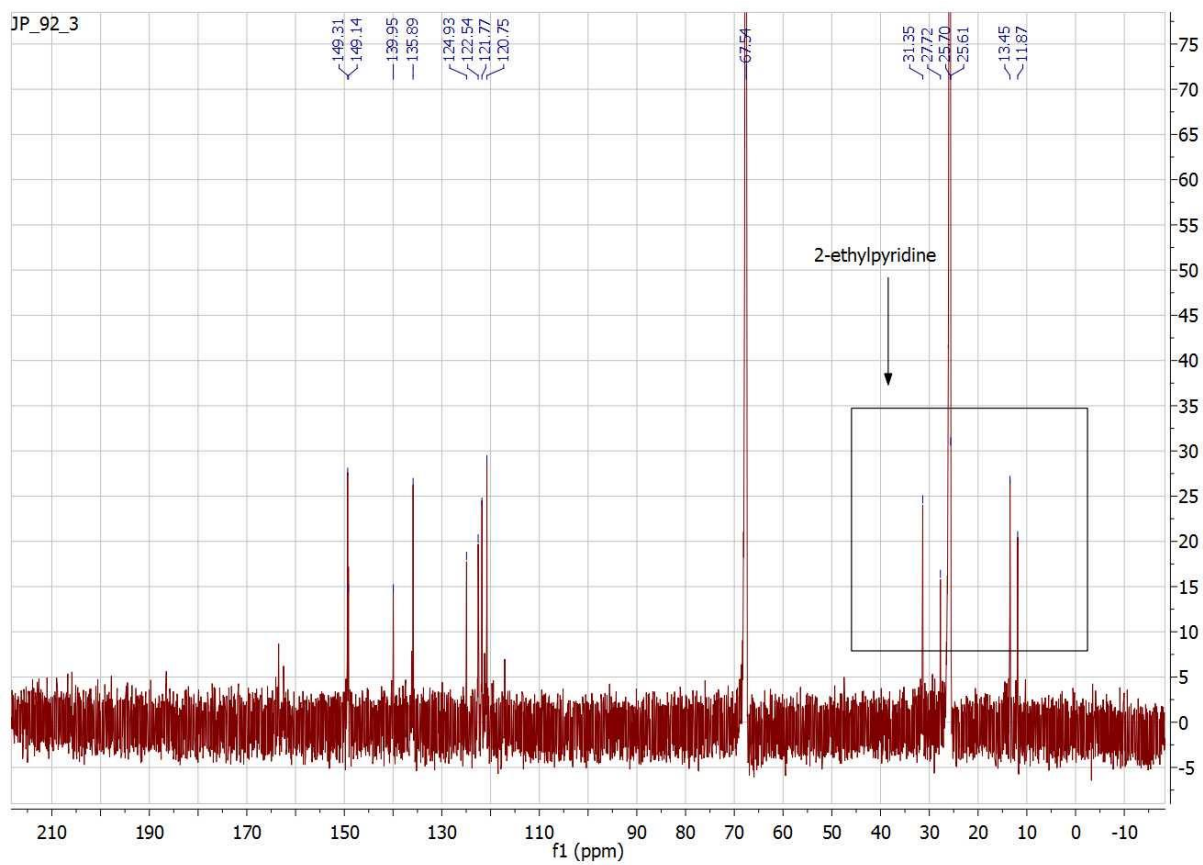

$^{11}\text{B}\{^1\text{H}\}$  NMR spectrum – final, THF, borosilicate NMR tube

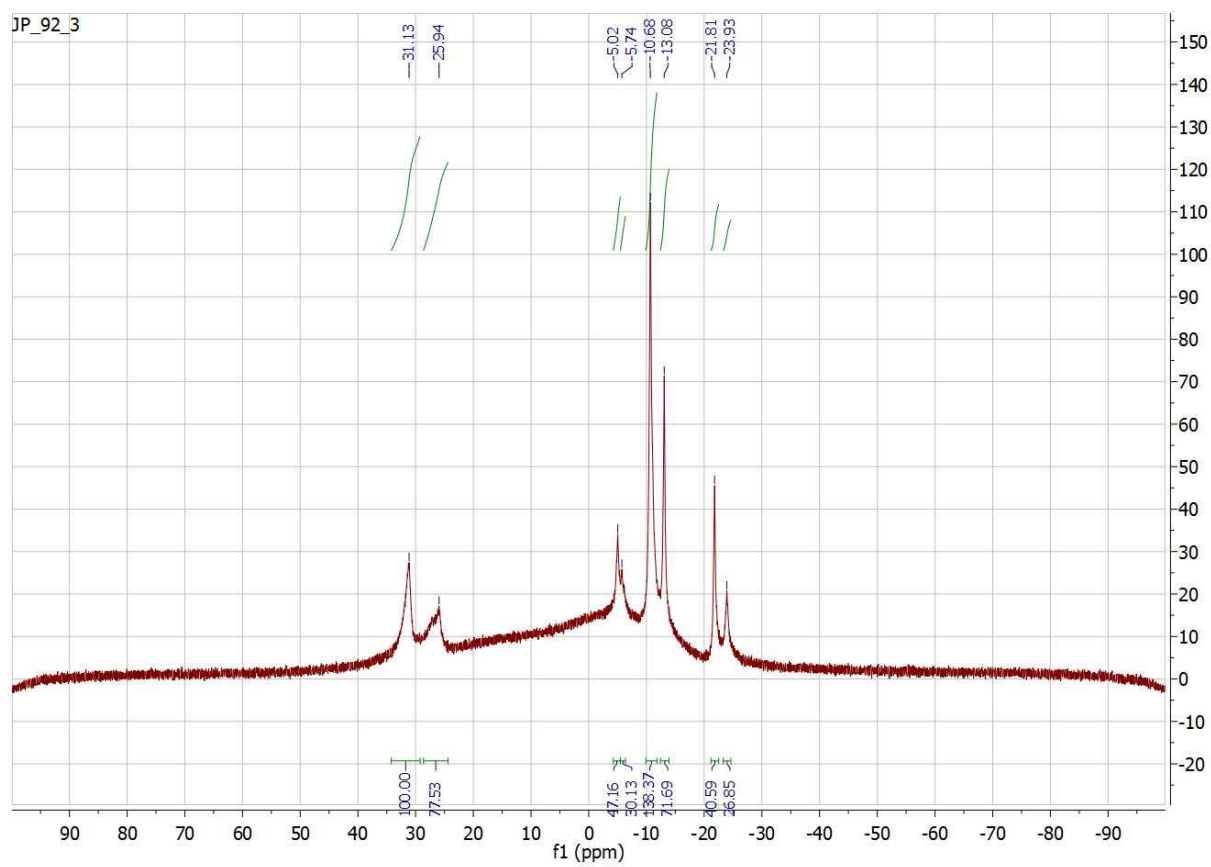

|                |          |                |                                              |                          |             |
|----------------|----------|----------------|----------------------------------------------|--------------------------|-------------|
| $\delta$ (ppm) | 31.1     | 26.0           | -5.0, -10.7, -24.0                           | -21.8                    | -5.7, -13.1 |
| Product        | Borazine | Polyborazylene | <i>B</i> -(cyclodiborazanyl)aminoborohydride | $\text{NH}_3\text{BH}_3$ | Unknown     |
| % Conversion   | 19.5     | 15.1           | 41.6                                         | 4.0                      | 19.8        |

GC spectrum

MS Data Review Active Chromatogram Plot - 1/6/2015 8:03 AM

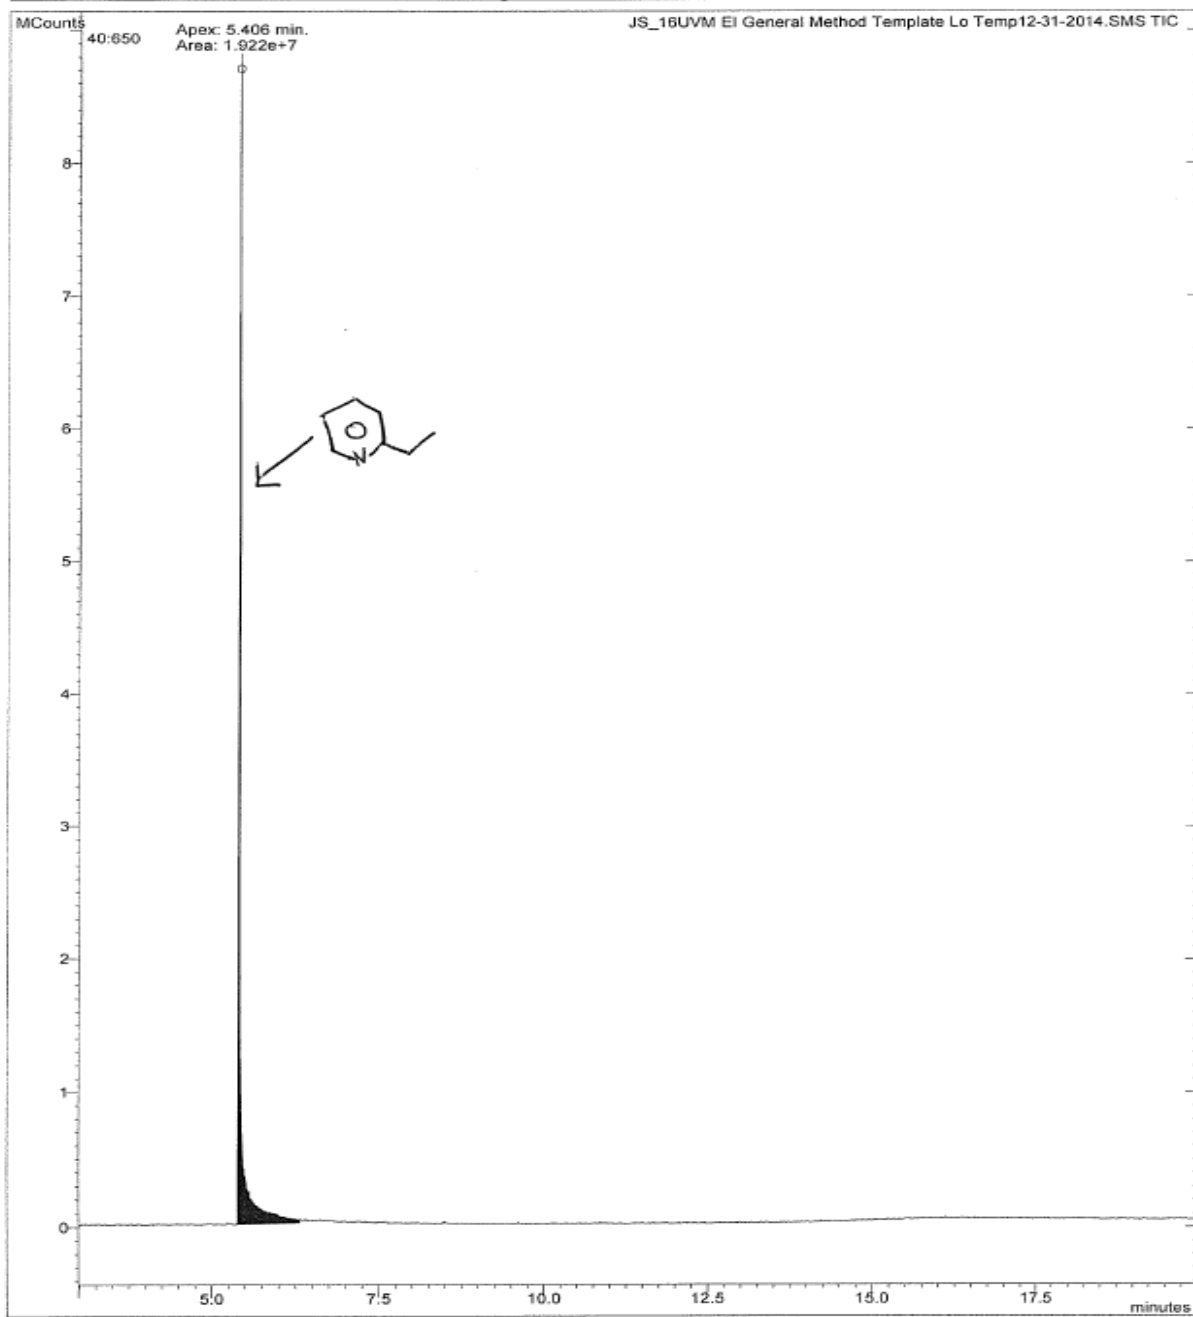

1. S. A. Frith and J. L. Spencer, *Inorg. Syn.*, 1990, **28**.
2. E. W. Powell and M. J. Mays, *J. Organomet. Chem.*, 1974, **66**, 137-147.
3. A. Staubitz, A. P. M. Robertson and I. Manners, *Chem. Rev.*, 2010, **110**, 4079-4124.
4. W. J. Shaw, J. C. Linehan, N. K. Szymczak, D. J. Heldebrant, C. Yonker, D. M. Camaioni, R. T. Baker and T. Autrey, *Angew. Chem. Int. Ed.*, 2008, **47**, 7493-7496.
5. A. Staubitz, A. P. M. Robertson, M. E. Sloan and I. Manners, *Chem. Rev.*, 2010, **110**, 4023-4078.
6. E. A. Bielinski, P. O. Lagaditis, Y. Zhang, B. Q. Mercado, C. Wurtele, W. H. Bernskoetter, N. Hazari and S. Schneider, *J. Am. Chem. Soc.*, 2014, **136**, 10234-10237.
